1     **Title: Enteric viruses evoke broad host immune responses resembling**  
2     **bacterial microbiome**

3     **Authors:** Dallari Simone,<sup>1</sup> Heaney Thomas,<sup>1</sup> Rosas-Villegas Adriana,<sup>1</sup> Neil Jessica A.,<sup>1</sup> Wong  
4     Serre-Yu,<sup>1,2</sup> Brown Judy J.,<sup>3,4</sup> Urbanek, Kelly,<sup>5</sup> Dermody Terence S.,<sup>5,6</sup> Cadwell Ken<sup>1,7,8\*</sup>

5     <sup>1</sup>Kimmel Center for Biology and Medicine at the Skirball Institute, New York University  
6     Grossman School of Medicine, New York, NY, 10016, USA

7     <sup>2</sup>Department of Medicine, Henry D. Janowitz Division of Gastroenterology, Susan and Leonard  
8     Feinstein Inflammatory Bowel Disease Center, Icahn School of Medicine at Mount Sinai, New  
9     York, New York, United States of America

10    <sup>3</sup>Department of Pathology, Microbiology, and Immunology, Vanderbilt University School of  
11    Medicine, Nashville, Tennessee, USA.

12    <sup>4</sup>Department of Biology, Trevecca Nazarene University, Nashville, Tennessee, USA

13    <sup>5</sup>Department of Pediatrics, University of Pittsburgh School of Medicine, Pittsburgh, Pennsylvania,  
14    USA

15    <sup>6</sup>Department of Microbiology and Molecular Genetics, University of Pittsburgh School of  
16    Medicine, Pittsburgh, Pennsylvania, USA

17    <sup>7</sup>Department of Microbiology, New York University Grossman School of Medicine, New York,  
18    NY 10016, USA

19    <sup>8</sup>Division of Gastroenterology and Hepatology, Department of Medicine, New York University  
20    Langone Health, New York, NY 10016, USA

21    **\*To whom correspondence should be addressed: Ken.Cadwell@med.nyu.edu**

## 22 **SUMMARY**

23 Contributions of the viral component of the microbiome, the virome, to the development of  
24 innate and adaptive immunity are largely unknown. Here, we systematically defined the host  
25 response in mice to a panel of eukaryotic enteric viruses representing six different families. Most  
26 of these viruses asymptomatically infected the mice, the magnitude and duration of which was  
27 dependent on the microbiota. Flow cytometric and transcriptional profiling of mice mono-  
28 associated with these viruses unveiled general adaptations by the host, such as lymphocyte  
29 differentiation and IL-22 signatures in the intestine as well as numerous viral strain-specific  
30 responses that persist. Comparison with a dataset derived from analogous bacterial mono-  
31 association mice identified bacterial species that evoke an immune response comparable to the  
32 viruses we examined. These results expand an understanding of the immune space occupied by  
33 the enteric virome and underscore the importance of viral exposure events.

## 34 **INTRODUCTION**

35 Our symbiotic relationship with the gut microbiota exemplifies host-microbe coadaptation. In  
36 addition to the mutually beneficial exchange of nutrients, intestinal colonization by bacteria shapes  
37 the development and function of the mammalian immune system (Honda and Littman, 2012;  
38 Round and Mazmanian, 2009). A variety of bacteria evoke context-specific responses that  
39 influence the gene expression program of the parenchyma and differentiation of leukocyte subsets  
40 (Atarashi et al., 2011; Ivanov et al., 2009; Mazmanian et al., 2005). The outcome of these reactions  
41 can be advantageous, as in colonization-resistance to pathogens, or adverse, as in chronic disorders  
42 such as inflammatory bowel disease (IBD). Investigations of the host response to individual  
43 bacterial species using gnotobiotic animals have led to important insights into the range of immune  
44 processes that are fine-tuned by the gut microbiota (Geva-Zatorsky et al., 2017; Sefik et al., 2015a;  
45 Tan et al., 2016).

46 Compared with bacteria, the consequences of intestinal colonization by fungi, protozoans, and  
47 viruses on the mucosal immune system are less characterized. Eukaryotic viruses occupy a  
48 potentially unique immunologic niche. Viruses, by replicating within mammalian cells, alter  
49 signaling cascades and membrane-trafficking pathways, are recognized by nucleic acid sensors  
50 and the antigen presentation machinery, and often disseminate to other sites as intracellular  
51 passengers. Enteric eukaryotic viruses are detected in healthy infant fecal specimens as early as a  
52 few days after birth and become increasingly prevalent and diverse during development (Liang et

53 al., 2020; Lim et al., 2015). Metagenomics analyses of the viral microbiome (virome) have linked  
54 various viruses to intestinal disorders such as IBD (Norman et al., 2015; Nyström et al., 2013;  
55 Ungaro et al., 2019). Additionally, both transient and persistent infections precede autoimmunity,  
56 as observed with the prolonged presence of enterovirus and the development of type 1 diabetes  
57 (T1D) (Vehik et al., 2019; Zhao et al., 2017), suggesting viral exposure has long-term immune  
58 consequences.

59 Our studies with murine norovirus (MNV) indicate that eukaryotic viruses can establish a  
60 symbiotic relationship with the host akin to commensal bacteria. Germ-free (GF) or antibiotic-  
61 treated mice display numerous intestinal defects, including reduced numbers of resident T cells  
62 and susceptibility to chemical injury (Round and Mazmanian, 2009). Inoculation with the  
63 persistent MNV strain, CR6, reverses these defects by inducing type I interferon (IFN-I),  
64 indicating that an antiviral response can provide developmental cues similar to those attributed to  
65 the bacterial microbiota (Kernbauer et al., 2014). Furthermore, colonization by MNV is protective  
66 in models of childhood enteric bacterial infections and hospital-acquired opportunistic infections  
67 (Abt et al., 2016; Neil et al., 2019). Like symbiotic bacteria, MNV triggers adverse outcomes when  
68 introduced into a susceptible background. Th1 cytokines induced by MNV cause disease in animal  
69 models of IBD (Basic et al., 2014; Bolsega et al., 2019; Cadwell et al., 2010; Matsuzawa-Ishimoto  
70 et al., 2017), and the inflammatory gene expression induced by MNV exacerbates bacterial sepsis  
71 (Kim et al., 2011). Similarly, MNV and orthoreovirus strain type 1 Lang (T1L), which causes  
72 asymptomatic or mild gastrointestinal infection in humans, induces a Th1 response that triggers  
73 the loss of immunologic tolerance to dietary gluten in a mouse model of celiac disease (Bouziat et  
74 al., 2017, 2018). Rhesus rotavirus (RRV) accelerates autoimmunity in non-obese diabetic mice  
75 following recognition by plasmacytoid dendritic cells (pDCs) (Drescher et al., 2015; Pane and  
76 Coulson, 2015). These observations may explain the epidemiological association between related  
77 viruses and disease in humans (Axelrad et al., 2018, 2019; Bouziat et al., 2017; Pane and Coulson,  
78 2015).

79 Despite evidence that eukaryotic viruses in the gut have both beneficial and detrimental effects  
80 on the host by influencing immune development, a broader characterization of the immune effects  
81 of viral exposure is lacking. Administration of antiviral drugs to conventional mice reduces  
82 intraepithelial lymphocyte numbers, cytokine levels, and resilience to intestinal injury through  
83 IFN-dependent and -independent mechanisms, suggesting that enteric viruses provide a broad

84 range of homeostatic cues to the host (Broggi et al., 2017; Liu et al., 2019; Yang et al., 2016).  
85 However, the contribution of individual viruses is unclear.

86 Here, we conducted an exhaustive cross-comparison of the host response and colonization  
87 dynamics of representative enteric viruses. Almost all the viruses we examined evoked a host  
88 response in the absence of disease manifestations, and many displayed enhanced capacity to persist  
89 in GF mice. Mono-association experiments revealed long-lasting and specific effects of individual  
90 viruses on immune cell populations and gene expression. Comparisons with bacteria-associated  
91 mice and studies defining the host response to individual bacterial species revealed overlapping  
92 yet distinct consequences of viral exposure. These results provide an overview of the immune  
93 space occupied by the enteric virome and highlight the wide range of responses that can occur  
94 following asymptomatic viral infection.

## 95 **RESULTS**

### 96 **Colonization and bacterial dependence of enteric viruses following a natural route of** 97 **inoculation**

98 Studies of viral commensalism are hampered by the lack of established animal models.  
99 Established models often involve peritoneal or intravenous inoculation of the virus to circumvent  
100 local defenses or employ inhibition of antiviral pathways using knockout mice. Another challenge  
101 comes from the capacity of segmented filamentous bacterium (SFB) and murine astrovirus, both  
102 of which are widespread in institutional vivaria, to inhibit infections by at least some viruses in the  
103 intestine (Ingle et al., 2019; Shi et al., 2019). As such, bacterial or viral microbiota may have  
104 prevented investigation of certain viruses. These concerns motivated us to perform a side-by-side  
105 comparison of viral burden following oral inoculation of conventional, specific-pathogen-free  
106 (SPF) and GF mice with different enteric viruses.

107 We selected a panel of 10 enteric viral strains encompassing six families comprising Groups I,  
108 II, III, and IV of the Baltimore classification: two adenoviruses (MAdV1 and 2), an astrovirus  
109 (MuAstV), two caliciviruses (MNV CR6 and CW3), a picornavirus (CVB3), two parvoviruses  
110 (MVMi and MVMp), and two reoviruses (T1L and RRV). These viruses infect mice, but a detailed  
111 time course of infection and corresponding immune response in wild-type C57BL/6 mice  
112 following oral inoculation has not been defined for most. Conventional and GF mice inoculated  
113 with each virus were monitored for signs of disease and virus in the stool and blood over a 2-month  
114 period. We could not recover infectious particles from MNV CW3 at the peak of infection and

115 found that the contents of stool inhibited detection of infectious viral particles, which prevented  
116 the use of plaque assays in all conditions (Fig. S1A). A related concern is that detection of  
117 infectious particles may be prone to false-negative results once neutralizing antibodies are  
118 produced, especially for blood samples. Therefore, we used qPCR, which is a sensitive assay to  
119 monitor viral clearance and facilitate comparisons between viruses. T1L and RRV were exceptions  
120 for which we used plaque assays, as the multi-segmented nature of the Reoviridae genome  
121 confounds quantification by qPCR.

122 Evidence of disease symptoms, such as diarrhea and hunched posture, were absent in almost all  
123 mice, and evaluation of intestinal tissues harvested 28 days post-inoculation (dpi) did not yield  
124 evidence of histological abnormalities (Fig. S1B-C). Mice inoculated with CVB3 were the only  
125 animals that consistently displayed disease. Despite administering the lowest dose of virus required  
126 for seroconversion, ~ 50% of conventional and GF mice did not survive (Fig. S1D). Considering  
127 our focus on commensalism, we excluded CVB3 from subsequent studies. We detected replication  
128 of each of the remaining nine viruses in both conventional and GF mice (Fig. 1A-B). Although we  
129 were unable to detect RRV in stool or blood, we detected anti-RRV neutralizing antibodies,  
130 indicating infection (Fig. 1C). MAdV1, MuAstV, and MVMi genomes were detected in the blood  
131 at two or more timepoints. Generally, the presence of these viruses in blood predicted their long-  
132 term detection in stool (30 dpi).

133 Observations made with antibiotic-treated and GF mice indicate the microbiota is required for  
134 optimal infection and transmission by certain enteric viruses (Baldrige et al., 2015; Kane et al.,  
135 2011; Kernbauer et al., 2014; Kuss et al., 2011), which we confirmed for MNV CR6. Surprisingly,  
136 most of the other viruses displayed similar or enhanced colonization of GF mice, including the  
137 closely related MNV CW3 (Fig. 1A-B and S1E). This apparent contradiction can be explained by  
138 a recent study showing that bacterial depletion inhibits MNV CW3 infection in one region of the  
139 intestine while promoting viral replication in another (Grau et al., 2020). It also is possible that GF  
140 mice are more susceptible to viruses because some aminoglycosides used as antibiotics to deplete  
141 bacteria from mice elicit an antiviral IFN-I response (Gopinath et al., 2018). MAdV1 and T1L  
142 reached higher peak titers in GF mice, but the microbiota did not affect the time to clearance (Fig.  
143 S1E). In contrast, MNV CW3, MAdV2, MVMi, and MVMp produced similar peak titers but  
144 prolonged viral shedding in the stool (Fig. S1E). MuAstV was not uniformly detectable in the stool  
145 of conventional mice, perhaps reflecting pre-existing immunity (Yokoyama et al., 2012), but

146 consistently high levels of viral RNA were recovered from GF mice (Fig. 1A-B). Collectively,  
147 these data show that exposure to enteric viruses can occur in the absence of overt disease, and  
148 many of the viruses chosen for study displayed improved colonization in GF mice. These results,  
149 summarized in Table 1, were used to design and interpret the subsequent analysis of the immune  
150 response evoked by these viruses.

### 151 **A reductionist approach to evaluate responses to viral exposure**

152 To determine whether asymptomatic viral infections are associated with sustained  
153 immunological changes, we conducted immune-profiling of mice infected with each virus, a  
154 reductionist method similar to that used to define the immunomodulatory activity of individual  
155 bacterial species (Geva-Zatorsky et al., 2017; Sefik et al., 2015a; Tan et al., 2016). Although single  
156 infections may potentially exaggerate the effect of an individual virus, this approach circumvents  
157 concerns about redundancy between viruses in our panel and viral and bacterial members of the  
158 microbiota.

159 We inoculated GF mice perorally with each virus and confirmed infection at 5 dpi. At 28 dpi,  
160 six intestinal and extra-intestinal tissues were harvested for analyses by multi-color flow  
161 cytometry: colonic and small intestinal lamina propria (cLP and siLP), small intestinal  
162 intraepithelial leukocytes (IELs), mesenteric lymph nodes (mLNs), spleen, and lungs. Each sample  
163 was analyzed for 32 immune cell subsets based on cell-surface markers and transcription factors.  
164 Lymphocyte subsets and functionality were further defined by intracellular staining of six effector  
165 cytokines (GRANZYME-B, IL-4, IL-10, IL-17a, IL-22, and IFN- $\gamma$ ) (Fig. S2). Whole colon and  
166 small intestine homogenates were subjected to RNA sequencing to examine transcriptional  
167 responses. These samples were compared with those prepared in parallel from control GF mice  
168 and GF mice colonized with a minimal defined flora (MDF) consisting of a consortium of 15  
169 bacterial strains representing the murine gut microbiota (Brugiroux et al., 2016). These  
170 experiments resulted in 462 flow cytometry samples, from which we obtained 21,619 individual  
171 immunophenotypes, and 127 transcriptomes.

### 172 **Enteric viruses promote changes in immune cell populations**

173 The corresponding fold changes in immune cell populations relative to GF status are shown in  
174 Table S1 and the heatmaps in Figure 2A (cLP and siLP) and Figure S3 (IELs, mLNs, lung, and  
175 spleen). Viral infection promoted the expansion or contraction of multiple populations, especially  
176 in the cLP and siLP. Although each virus had a unique effect, common population changes were

177 altered in a unidirectional manner; we rarely observed a population that increased with one virus  
178 and decreased with another. Viruses were observed to modulate as many immune subsets as MDF  
179 bacterial microbiota control (Fig. 2A), suggesting that viruses shape intestinal immune responses.

180 Our results confirmed several anticipated outcomes, substantiating the validity of our approach.  
181 We observed a decrease in CD4<sup>+</sup> and CD8<sup>+</sup> naïve T cells (CD62L<sup>+</sup>CD44<sup>-</sup>) and a corresponding  
182 increase in CD4<sup>+</sup> and CD8<sup>+</sup> effector memory T cells (CD62L<sup>-</sup>CD44<sup>+</sup>) (Fig. 2B-C). We also  
183 detected an increase in T-bet<sup>+</sup> T cells, indicative of a Th1 response (Fig. 2D) (Szabo et al., 2000).  
184 Our screen highlighted an increase of macrophages in the cLP in response to MNV CW3,  
185 consistent with effects in conventional mice inoculated with this virus (Winkle et al., 2018).  
186 Furthermore, at least three enteric viruses induced an expansion of colonic pDCs (Fig. 2E), a  
187 population strongly modulated by the bacterial microbiota (Geva-Zatorsky et al., 2017). Despite  
188 this commonality, the overlap between mice inoculated with viruses and MDF was limited. One  
189 of the most prominent effects of MDF was the induction of FOXP3<sup>-</sup>RORγt<sup>+</sup> CD4<sup>+</sup> Th17 cells, but  
190 the effect of viral exposure on this population was negligible (Fig 2A). Instead, we observed an  
191 increase of FOXP3<sup>+</sup> CD4<sup>+</sup> T cells (Tregs) by MVMi in the cLP (Fig. 2F) and by T1L and MAdV1  
192 in the siLP (Fig. 2G). The absence of RORγt within this population (Fig. 2A) suggests that these  
193 Tregs are distinct from bacterial-induced peripheral Tregs (Sefik et al., 2015b).

194 We used hierarchical clustering to define the relative similarity of the overall immune cell  
195 composition between conditions (Fig. 2H-I). In both cLP and siLP, MDF was in a clade distinct  
196 from individual viruses and the GF control. Viruses did not segregate based on taxonomical  
197 relationships, suggesting the immunomodulatory properties observed were marginally intrinsic to  
198 a viral family or genus. To quantify how virus-associated variables can explain the variance  
199 observed between samples, we conducted a distance-based redundancy analysis (db-RDA) based  
200 on shared characteristics (Table 1): genome type (DNA versus RNA), the capacity to persist in the  
201 host, defined as detectable virus 30 dpi in blood or stool (*persistence*), and detectable virus in blood  
202 (*viremia*). We included the identity of the virus (*identity*) as a benchmark variable in this analysis.  
203 Indeed, *identity* was the major explanatory variable, which alone accounted for almost 25% of the  
204 variance, supporting the conclusion that individual viruses promote substantially distinct  
205 immunomodulatory outcomes (Fig. 2J-K). The second strongest explanatory variable was *genome*  
206 type, although the effect size was modest. The combined effect size of the *genome*, *persistence*,  
207 and *viremia* variables left much of the variance unexplained, indicating that differences in immune

208 responses to these viruses are likely due to complex interactions between each virus and the host.

209 Among the other tissue compartments examined, mLNs and lungs displayed the greatest  
210 changes in immune cells following viral infection (Fig. S3). Like the intestinal lamina propria, we  
211 observed, to a lesser extent, a decrease in naïve and an increase in effector memory CD4<sup>+</sup> and  
212 CD8<sup>+</sup> T cells in the lungs. Together, these data indicate that enteric viruses influence the immune  
213 cell composition of a naïve host, much of which is virus strain-specific. Even for non-persistent  
214 viruses, alterations in immune cell frequencies were observed in mice long after the last time point  
215 in which viral nucleic acid was detectable.

### 216 **Enteric viruses increase cytokine production by immune cells**

217 In parallel with the above analyses, we assessed cytokine production following PMA-  
218 ionomycin stimulation of single cell suspensions from each tissue (Fig. 3A, S4A, and Table S1).  
219 Inoculation with several viruses led to an increase in cLP T cells producing the Th1 cytokine, IFN-  
220  $\gamma$  (Fig. 3B), which correlated with the increase in T-bet<sup>+</sup> lymphocytes (Fig. S4B). The increase in  
221 IL-17<sup>+</sup> CD4<sup>+</sup> T cells was specific to mice colonized with MDF (Fig. 3A). IL-22 is a tissue  
222 regenerative cytokine that mediates the protective effect of MNV in models of intestinal injury  
223 and bacterial infection (Abt et al., 2016; Neil et al., 2019). Most viruses enhanced IL-22 production  
224 by a variety of cLP and siLP lymphoid cells including CD4<sup>+</sup> T cells,  $\gamma\delta$ <sup>+</sup> T cells, and ILCs (Fig.  
225 3A). Quantification of total IL-22<sup>+</sup> cells using an inclusive CD45<sup>+</sup> gate in our profiling protocol  
226 indicated that cLP infected by six of the viruses and siLP infected by five of the viruses increased  
227 the total proportion of IL-22-producing cells (Fig. 3C-D). This IL-22 production by CD45<sup>+</sup> cells  
228 correlated with the proportion of granulocytes and mononuclear phagocytes in the cLP (Fig. S4C).  
229 The increase in IL-22<sup>+</sup> cells was evident in mice that were inoculated with non-persistent viruses,  
230 most notably T1L, indicating that alterations in the function of immune cells can be sustained long  
231 after the virus is below the threshold of detection (Fig. 3A).

232 Although we did not observe common changes in the capacity to produce cytokines in other  
233 tissue compartments as we observed for IL-22 in the lamina propria, we noted several changes in  
234 the proportion of cytokine-producing immune cells that were virus strain-specific (Fig. S4A). As  
235 an example, IFN- $\gamma$ <sup>+</sup>IL-10<sup>+</sup> CD4<sup>+</sup> T cells (Tr1 cells), a T-helper subset with regulatory functions  
236 (Häringer et al., 2009), was increased in mice infected with persistent MNV strain CR6 in cLP and  
237 mLN (Fig. 3E-F).

238 Hierarchical clustering of cytokine production in cLP and siLP cells showed that virus-infected



239 mice did not form clades independent of GF and MDF mice as obviously as they did when  
240 analyzing immune cell populations based on cell-surface markers and transcription factors (Fig.  
241 3G-H). As with the prior analyses, viruses from the same families did not uniformly cluster  
242 together, and the major explanatory variables for cytokine production were *identity*, followed by  
243 *genome* (Fig. 3I-J). Together, these results indicate that virus-infected mice display increases in  
244 cytokine-producing immune cells that are both common and virus-strain specific.

### 245 **Intestinal transcriptome of virus-infected mice**

246 Of genes profiled in the colon and small intestine, 497 and 355, respectively, displayed  
247 differential expression (DE) in at least one virus-infection condition compared with GF mice ( $\geq 2$ -  
248 fold,  $p$  value  $\leq 0.01$ ) (Fig. 4A-C, Table S2A-B). In comparison, 146 and 92 genes in the colon and  
249 small intestine displayed differential expression in MDF-colonized mice and minimally  
250 overlapped with the virus-induced expression changes (Fig. 4D-E, Table S2C-D). Gene ontology  
251 (GO) analyses showed that viral infection influenced a wide range of immune-related pathways,  
252 especially in the colon (Fig. 4F-G). Viral infection was associated with antiviral immunity  
253 pathways, such as *defense response to virus* and *cellular response to interferon-beta*. The  
254 enrichment for genes associated with IFN- $\gamma$  is consistent with the flow cytometry data identifying  
255 a Th1 response. Both MDF and viruses were associated with B cell activation and bacterial  
256 response pathways. The enrichment of DE genes involved in metabolic processes was specific to  
257 MDF, perhaps reflecting the nutrient exchange between host and bacteria.

258 Permutational multivariate analysis of the variance after principal component analysis (PCA)  
259 confirmed that the transcriptional responses to viruses differed significantly from that of GF and  
260 MDF conditions and that each virus induced a distinct gene expression pattern (Fig. 4H-I and S5A-  
261 B). The major explanatory variables of the variance between samples were again *identity* followed  
262 by *genome* (Fig. 4J-K). Because much of the transcriptome variance was unexplained, we  
263 determined whether the immune cell composition and cytokine production (described in Figs. 2  
264 and 3) correlated with differences in gene expression between conditions. DC and T cell subsets  
265 were major explanatory variables and included cell types with recognized functions in antiviral  
266 responses such as Tbet<sup>+</sup> CD4<sup>+</sup> T cells and pDCs (Fig. 4L). Among the cytokines tested, only IL-  
267 22 was a significant explanatory parameter (Fig. S5C), likely reflecting the role of this cytokine in  
268 coordinating antimicrobial gene expression (Keir et al., 2020). Collectively, these results correlate  
269 well with our flow cytometry data and reveal responses common to multiple viruses, while also

270 underscoring the importance of investigating the immune effects of individual virus strains, which  
271 cannot be predicted based on taxonomic features alone.

## 272 **Intestinal gene expression common and specific to individual viruses**

273 We next identified specific genes and pathways associated with each virus individually and  
274 those in common. We observed 15 and three differentially regulated genes in the colon and small  
275 intestine, respectively, that were shared by at least half of the viruses studied, including  
276 immunoglobulin genes *Igha*, *Igkc*, *Iglc1*, *Jchain*, and *Pou2af1* (Fig. 5A-B). This finding is  
277 consistent with the increased expression of genes associated with B cell activation (Fig. 4F-G) as  
278 well as previous findings that MNV CR6 enhances local and systemic antibody production in GF  
279 mice and that IgA production is frequently observed during enteric viral infections (Blutt and  
280 Conner, 2013; Kernbauer et al., 2014).

281 Increased expression of antimicrobial genes is a hallmark of intestinal colonization by  
282 symbiotic bacteria (Geva-Zatorsky et al., 2017; Hooper et al., 2001). We examined expression of  
283 antimicrobial genes during viral infection by constructing an antimicrobial gene set in which genes  
284 annotated in GO:0050829 (defense response to Gram-negative bacterium), GO:0050830 (defense  
285 response to Gram-positive bacterium), and GO:0061844 (antimicrobial humoral immune response  
286 mediated by antimicrobial peptide) were pooled. Expression of numerous antimicrobial genes was  
287 increased in virus-infected mice compared with GF controls ( $\geq 1.5$ -fold change,  $p \leq 0.01$ ) (Fig.  
288 5C-D). However, the overall response was not as strong as that induced by MDF. Nonetheless,  
289 there were transcripts induced exclusively by viruses, including mannose-binding protein C (*Mbl2*)  
290 and the interferon-inducible GTPases, *Iigp1*, *Irgm2*, and *Gbp2*.

291 MNV CR6 but not MNV CW3 fortifies the intestinal barrier by inducing a local IFN-I response  
292 (Kernbauer et al., 2014; Neil et al., 2019). IFN-I (IFN- $\alpha$  and - $\beta$ ) and type III interferon (IFN- $\lambda$ ) are  
293 antiviral cytokines produced in response to viral nucleic acid that evoke a similar set of interferon-  
294 stimulated genes (ISGs), which we collectively term here as an “IFN signature”. Consistent with  
295 our previous findings, colonization with MNV CR6 but not MNV CW3 was associated with an  
296 IFN signature (Fig. 5E). Surprisingly, no other virus from our panel yielded an IFN signature,  
297 despite high levels of viral nucleic acid produced by some of them, such as MuAstV. Moreover,  
298 only MNV CR6 was associated with increased transcription of ISG regulators (Fig. 5F). We  
299 confirmed that expression of representative ISGs *Isg15*, *Ifit1*, and *Oasl1* was increased only in  
300 mice colonized with MNV CR6 (Fig. S6A).

301 In contrast to IFN-I, IL-22 should regulate expression of DE genes for multiple viruses based  
302 on its effect size on transcriptional variance (Fig. S5C). To test this prediction, we used Gene Set  
303 Enrichment Analysis (GSEA) to determine whether transcripts altered in the intestine of *Il-22*<sup>-/-</sup>  
304 mice (Gronke et al., 2019) were differentially regulated in virus-infected mice. This analysis  
305 confirmed that most virus-infected mice produced an IL-22 signature. (Fig. S6B-C).

306 We used Ingenuity Pathway Analysis (IPA) to identify additional regulators in the following  
307 categories: *cytokine*, *ligand-dependent nuclear receptor*, *transmembrane receptor*, *transcript*  
308 *regulator*, and *other*. In the colon, four viruses were associated with such regulators. IFN-related  
309 factors were the main regulators associated with MNV CR6, whereas MuAstV, MVMp, and T1L  
310 upregulated other pathways (Fig. 5G). PRDM1, also known as BLIMP1, is a regulator of terminal  
311 B-cell differentiation (Shaffer et al., 2002) and influenced transcriptional responses to MuAstV  
312 and T1L, supporting a role for viruses in B cell development. The association of MuAstV and  
313 macrophage differentiation factor CSF-1 is consistent with the observation that MuAstV-colonized  
314 mice displayed an increase in cLP macrophages (Fig. 2A). In the small intestine, genes induced by  
315 pro-inflammatory cytokines such as IL-1 $\beta$ , IFN- $\gamma$ , and TNF- $\alpha$  were enriched in mice infected with  
316 either MVMi or RRV (Fig. 5H). Other factors identified by this approach have been implicated in  
317 immunity in some settings. For example, insulin (Ins1), which was associated with MVMi  
318 infection, is involved with IFN- $\gamma$  in a feedback loop to promote the effector CD8<sup>+</sup> T cell response  
319 to murine cytomegalovirus infection (Šestan et al., 2018). Therefore, in addition to the classic ISGs  
320 downstream of IFN-I that we observe for MNV CR6, viral exposure induces the expression of  
321 genes regulated by a range of signaling molecules and pathways required for mucosal immunity.

### 322 **Intestinal transcriptomes of virus-infected mice are enriched for bacterial microbiome gene** 323 **signatures**

324 We used a GSEA strategy analogous to a previously described approach (Godec et al., 2016)  
325 to compare the transcriptome of virus-infected mice with gene-expression signatures of mice  
326 monocolonized with 53 individual species of the bacterial microbiota (Geva-Zatorsky et al., 2017)  
327 (Fig. 6A-D, Table S3). Colonic transcripts of MDF-colonized mice in our study were positively  
328 enriched for genes upregulated in microbiota-replete conditions (conventional SPF mice) (Geva-  
329 Zatorsky et al., 2017), indicating concordance in the positive controls (Fig. 6A). Similarly, the  
330 small intestinal transcriptome of MDF-colonized mice displayed a negative enrichment score for  
331 genes downregulated in conventional SPF mice (Fig. 6D). Twenty of the 53 bacterial species

332 displayed a relationship with one or more viruses using this approach. We identified 91 virus-  
333 bacterium pairs, with 60 displaying the same directionality of regulation (i.e., positive enrichment  
334 of upregulated bacterial gene sets in virus-associated transcripts and negative enrichment of  
335 downregulated bacterial gene sets in virus-associated transcripts) (Fig. 6A-D). Certain bacterial  
336 gene sets displayed exclusive pairing with one virus, as observed with several *Bacteroides* and  
337 *Parabacteroides* species and T1L in the colon. This consistent pairing between T1L and the  
338 Bacteroidales order suggests that this virus induces a similar reaction to colonization by this  
339 prototypical group of commensal bacteria. The MNV CR6-induced gene set also was paired with  
340 multiple bacterially upregulated gene sets in the colon. We observed a particularly strong  
341 enrichment for the *Enterococcus faecalis* signature, a facultative anaerobic bacterium of the  
342 Enterococcaceae family (Fig. 6E).

343 Lastly, we compared our intestinal flow cytometry data with results gathered using mice  
344 monocolonized with bacteria (Geva-Zatorsky et al., 2017). Due to differences in gating strategies  
345 and markers used to identify cell types, we restricted our comparison to 16 immune cell subsets  
346 that were quantified in a similar manner across the datasets (Table S4). Hierarchical clustering  
347 using the z-scores of the two datasets indicated that the GF groups from both datasets clustered  
348 together, as did MDF from our study and SPF from Geva-Zatorsky et al (Fig. 6F-G). Most bacteria  
349 and viruses clustered together with GF or in neighboring clades distinct from MDF and SPF,  
350 suggesting the contribution of a specific bacterium or virus, when present alone, accounts for only  
351 a modest fraction of the total microbiota-dependent effects on immune cell composition. The  
352 viruses were interspersed among bacteria rather than clustered together in a single clade, indicating  
353 that virus-induced changes to immune cell frequencies does not reflect a uniform immunological  
354 response to viruses distinct from that evoked by bacteria.

## 355 **DISCUSSION**

356 In this study, we investigated whether asymptomatic or subclinical infections of the  
357 gastrointestinal tract by eukaryotic viruses shape the mucosal immune system, as has been  
358 demonstrated for numerous bacterial members of the microbiota (Honda and Littman, 2012;  
359 Round and Mazmanian, 2009). Only one of the 10 viruses chosen for study led to illness or death,  
360 allowing us to define the immune effects of nine viruses in the absence of disease.

361 In the process of establishing virus infection models, we made several observations about the  
362 dynamics of infection. First, we found that nucleic acid of several viruses remains detectable in

363 stool or blood for a prolonged interval. Unlike retroviruses and herpesviruses, members of these  
364 viral families are not known to establish latency. Observations with measles virus infections  
365 indicate that viral antigens and RNA can persist, even for viruses that do not establish latency or  
366 integrate DNA copies into the host genome (Griffin, 2020). For some viruses, this type of  
367 persistence could be mediated by immune evasion, as proposed for MNV (Lee et al., 2019; Tomov  
368 et al., 2017). Regardless of the mechanism, we found that the microbiota had a strong effect on  
369 persistence. While antibiotic treatment hinders infection by some enteric viruses (Baldrige et al.,  
370 2015; Kernbauer et al., 2014; Kuss et al., 2011), our data showed that not all viruses benefit from  
371 the presence of bacteria. An important future goal is to determine whether this resistance to  
372 infection displayed by conventional mice reflects the presence of specific autochthonous viruses  
373 or bacteria in the gut (Ingle et al., 2019; Shi et al., 2019).

374 Our flow cytometric and transcriptional analyses were well correlated and support the  
375 hypothesis that asymptomatic colonization by enteric viruses has consequences for the host.  
376 Although each virus was associated with a unique immune profile following oral inoculation of  
377 GF mice, there were a few recurrent themes. Viral infection generally promoted the differentiation  
378 of lymphocytes, specifically maturation of T cells and Th1 polarization. Laboratory mice display  
379 deficiencies in mature T cells due to the absence of exposure to infectious agents while housed in  
380 SPF conditions (Beura et al., 2016; Lin et al., 2020; Yeung et al., 2020). In this context, it is notable  
381 that wild mice and pet-shop mice, which have a more mature lymphocyte compartment, are  
382 seropositive for viruses closely related to those in our panel (adenovirus, MNV, parvovirus,  
383 reovirus, and rotavirus) (Beura et al., 2016). These common enteric viruses may contribute to  
384 immune maturation in the natural environment.

385 We find it noteworthy that the immune effects of a given virus could not be explained by  
386 qualitative features alone. Closely related viral strains evoked distinct responses in most of the  
387 parameters we assessed. The nucleic acid composition of the viral genome (DNA versus RNA)  
388 contributed modestly but reproducibly to the variance, whereas viral dissemination and persistence  
389 did not appear to explain differences between conditions. Accordingly, one remarkable finding  
390 was that changes to immune cells and gene expression patterns were readily observed in mice in  
391 which viral nucleic acid was no longer detectable. If this sustained effect of viruses translates to  
392 humans, then cross-sectional metagenomics studies of patient cohorts would miss potentially  
393 meaningful exposures to viruses that occurred prior to disease onset. Longitudinal virome analyses

394 of children genetically susceptible to T1D identified an inverse relationship between early life  
395 adenovirus and circovirus exposure with subsequent appearance of serum autoantibodies (Vehik  
396 et al., 2019; Zhao et al., 2017). Thus, we advocate prospective and longitudinal sampling for  
397 virome-association studies when possible.

398 Based on our prior studies with MNV, we anticipated that at least some virus-infected mice  
399 would display an IFN signature. Instead, we observed an increase in IL-22-producing cells and an  
400 IL-22-mediated gene-expression pattern following infection by several of the viruses in our panel.  
401 IL-22 functions in intestinal homeostasis and expression of antimicrobial genes (Gronke et al.,  
402 2019; Keir et al., 2020). We think it possible that IL-22 induction offsets damage caused by enteric  
403 viruses, thereby facilitating a commensal relationship.

404 A comparison between our results and an analogous dataset gathered using bacterial  
405 monocolonization identified virus-bacterium pairs that stimulate overlapping responses by the  
406 host. For example, *E. faecalis* and MNV CR6 shared a colonic gene expression signature, which  
407 increased our confidence in the approach because these two infectious agents also share the  
408 capacity to confer protection in the DSS model of intestinal injury (Kernbauer et al., 2014; Neil et  
409 al., 2019; Takahashi et al., 2019; Wang et al., 2014). Several of the bacteria that evoke an immune  
410 response overlapping with viruses are implicated in disease, such as *Ruminococcus gnavus* and  
411 *Bacteroides vulgatus* in IBD (Hall et al., 2017; Png et al., 2010; Rath et al., 1999). It will be  
412 interesting to test the role of the matching viruses in animal models in which disease is dependent  
413 on these bacteria (Bloom et al., 2011; Ramanan et al., 2014, 2016; Yu et al., 2020).

414 Our survey was restricted to a limited number of viruses and, therefore, we were not able to  
415 capture the vast diversity of viruses found in humans. Unlike bacteria isolated from the human gut,  
416 which almost always colonize GF mice, many medically important viruses display narrow species  
417 tropism or altered virulence when inoculated into mice. A broader survey of viruses will likely  
418 identify additional cell types and pathways influenced by viral infection. Another limitation is that  
419 we chose a single-infection approach to identify direct responses and avoid missing immune  
420 effects that overlap with the existing microbiota. This approach also enabled our *in-silico*  
421 comparison of virus-induced immune responses with those induced in mice monocolonized with  
422 bacteria.

423 We envision two situations in which our results can guide studies investigating how the enteric  
424 virome modulates immunity in the presence of bacteria. First, mice associated with defined flora

425 can be used to assess the immune effects of individual bacteria within a complex community  
426 (Fischbach, 2018). This synthetic ecology approach could incorporate viruses with immunogenic  
427 potential from our panel to better reflect the complexity of the real-world microbiome. Second, we  
428 advocate testing the role of these and other viruses in animal models of inflammatory diseases,  
429 many of which are thought to be dependent on bacterial members of the microbiota. Although the  
430 Th1 response to MNV CR6 is inconsequential in wild-type C57BL/6 mice, mutation of IBD-  
431 susceptibility gene *ATG16L1* sensitizes the intestinal epithelium to the otherwise subtle effect of  
432 viral infection (Cadwell et al., 2010; Matsuzawa-Ishimoto et al., 2017). Observations in studies of  
433 MNV-infected mutant mice allowed us to identify homeostatic mechanisms involved in barrier  
434 integrity that are conserved in humans (Cadwell et al., 2008; Matsuzawa-Ishimoto et al., 2020).  
435 Thus, incorporating viruses into genetic disease models can reveal vital pathways that promote  
436 health.

437 Our findings indicate that eukaryotic viruses in the gut have unappreciated immunomodulatory  
438 capacity in addition to well-recognized roles as causative agents of gastroenteritis. The reaction to  
439 viral infection could be beneficial in the appropriate setting, as demonstrated by proof-of-principle  
440 experiments showing that MNV and MuAstV strains administered prophylactically protect mice  
441 from enteropathogenic *E. coli* (Cortez et al., 2020; Neil et al., 2019). There is precedent for  
442 manipulation of the gut virome for therapeutic purposes. Oral poliovirus vaccine provides cross-  
443 protection against other pathogens, which has been used as a rationale to administer this attenuated  
444 virus instead of inactivated vaccine in polio-endemic regions (Uppill-Brown et al., 2017). Our  
445 ongoing studies using animal models will enable future safety and efficacy assessments of virome-  
446 based interventions.

## 447 **ACKNOWLEDGMENTS**

448 We wish to thank Dr. Julie Pfeiffer (UT Southwestern), Dr. Jason G. Smith (University of  
449 Washington), Dr. David Pintel (University of Missouri), Dr. Peter Tattersall (Yale University), Dr.  
450 Harry B Greenberg (Stanford University), and Dr. Kathy McCoy (University of Calgary) for  
451 sharing reagents with us and providing advice regarding culturing techniques. We wish to thank  
452 the NYU Grossman School of Medicine Flow Cytometry and Cell Sorting, Microscopy, Genome  
453 Technology, and Histology Cores for use of their instruments and technical assistance (supported  
454 in part by National Institutes of Health [NIH] grants P31CA016087, S10OD01058, and  
455 S10OD018338). We also wish to thank Margie Alva, Juan Carrasquillo, and Beatriz Delgado for

456 technical assistance with gnotobiotics. This research was supported by NIH grants DK093668  
457 (K.C.), AI121244 (K.C.), HL123340 (K.C.), AI130945 (K.C.), R01 AI140754 (K.C.), F31  
458 DK108562 (J.J.B.), T32 HL007751 (J.J.B.), R01 AI038296 (T.S.D.), R01 DK098435 (T.S.D.),  
459 and a pilot award from the NYU Cancer Center grant P30CA016087 (K.C.). Additional support  
460 was provided by the Faculty Scholar grant from the Howard Hughes Medical Institute (K.C.),  
461 Crohn's & Colitis Foundation (K.C.), Merieux Institute (K.C.), Kenneth Rainin Foundation (K.C.),  
462 Judith & Stewart Colton Center of Autoimmunity (K.C.), and the Heinz Endowments (T.S.D.).  
463 K.C. is a Burroughs Wellcome Fund Investigator in the Pathogenesis of Infectious Diseases.

#### 464 **AUTHOR CONTRIBUTIONS**

465 S.D. and K.C. conceived the study and designed the experiments. S.D. performed, analyzed,  
466 and interpreted all the experiments. T.H. and A.R.V. helped perform the viral colonization  
467 experiments. J.A.N. helped design and interpret data regarding MNV. S.Y.W. prepared the  
468 minimal defined flora. J.J.B., K.U., and T.S.D. provided the T1L virus and helped design T1L  
469 detection method. K.C. oversaw analysis and interpretation of all experiments described. S.D. and  
470 K.C. wrote the manuscript with inputs from all the authors.

#### 471 **DECLARATION OF INTERESTS**

472 K.C. receives research funding from Pfizer and Abbvie. K.C. has consulted for or received an  
473 honorarium from Puretech Health, Genentech, and Abbvie. K.C. has provisional patents, U.S.  
474 Patent Application. No. 15/625,934 and 62/935,035.



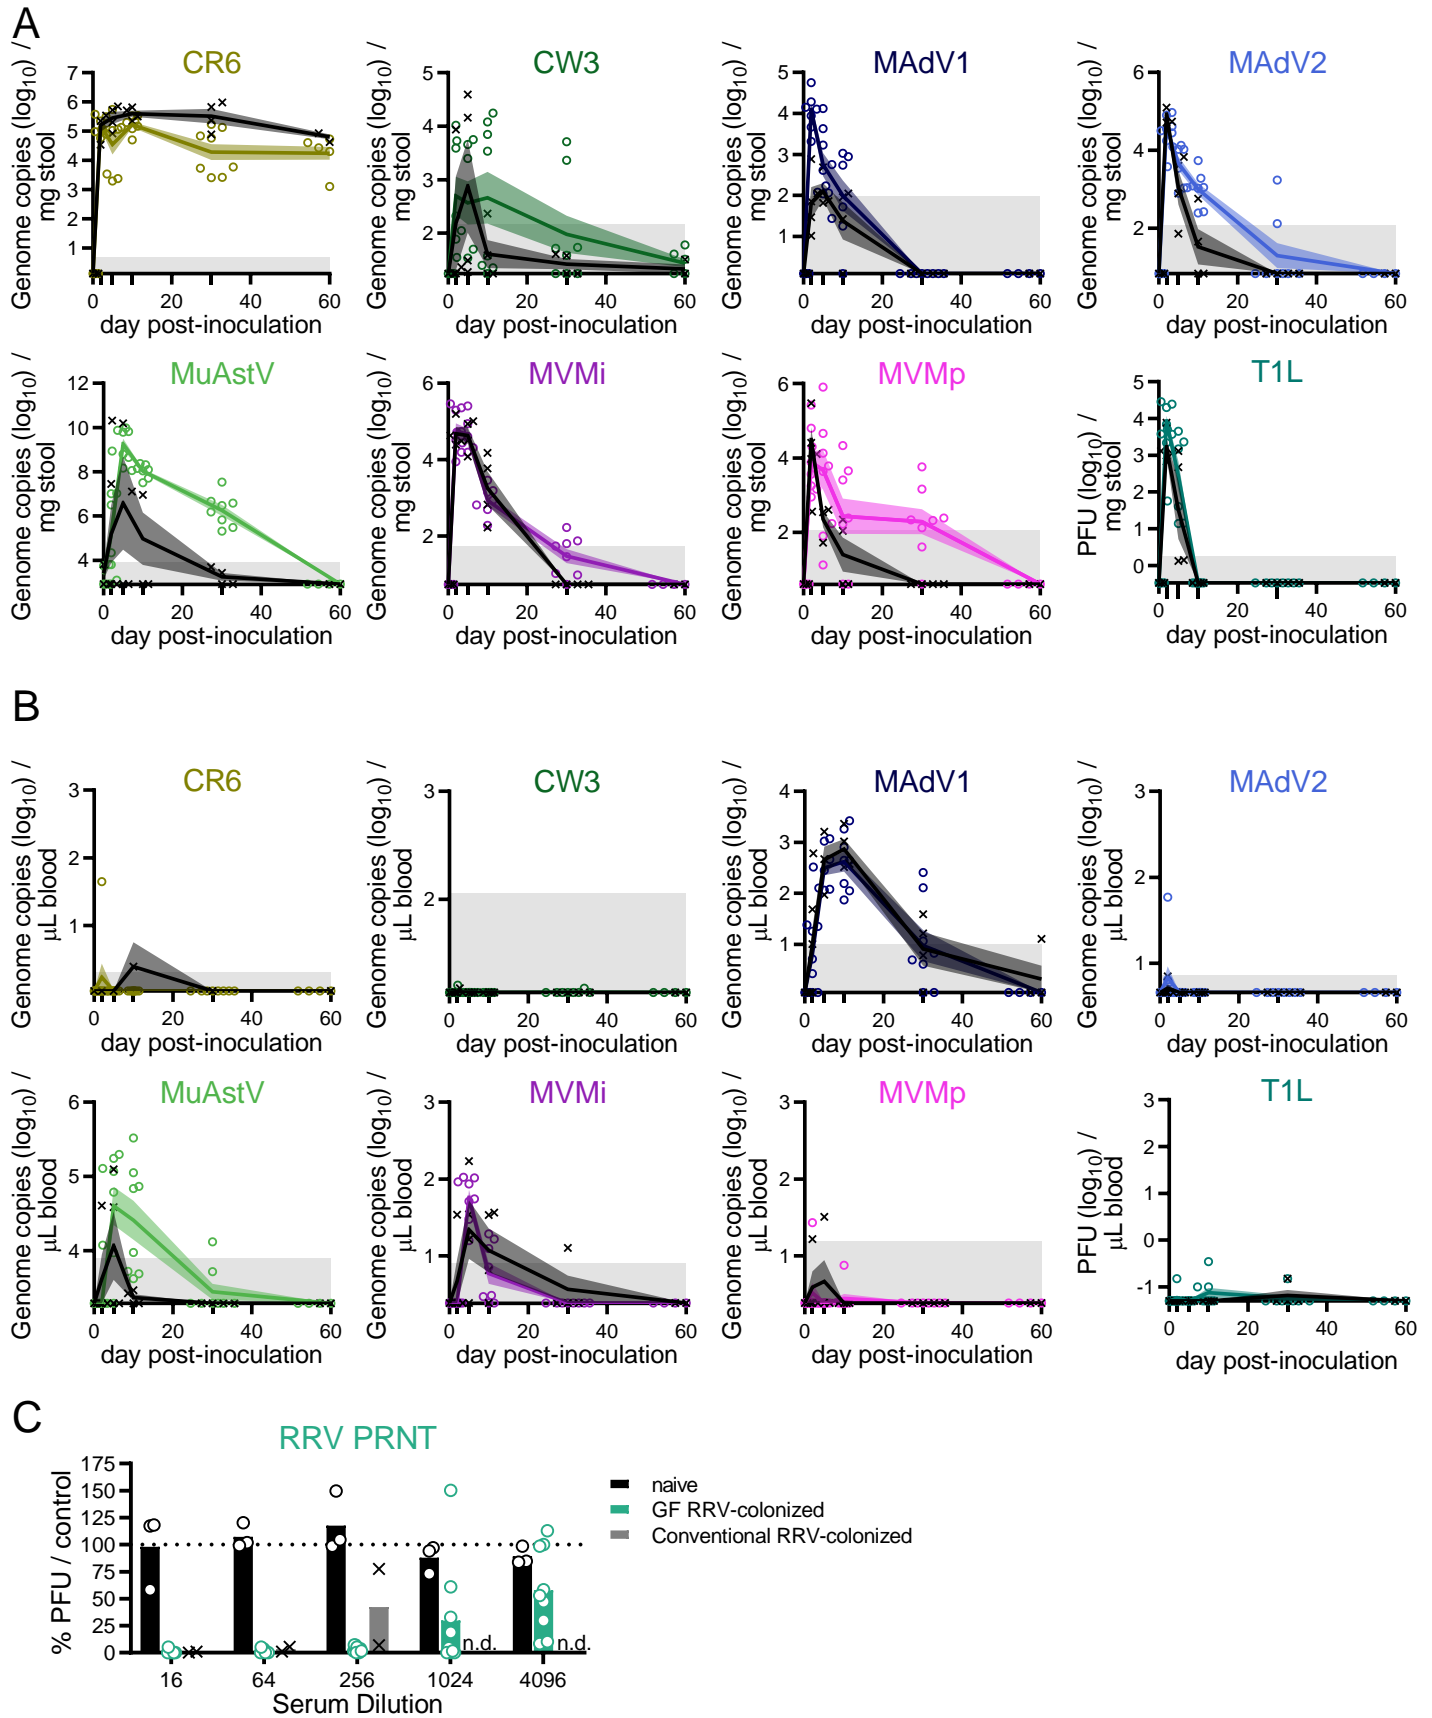

**Figure 1**

475 **Figure 1. Colonization and Bacterial Dependence of Enteric Viruses Following the Natural**  
476 **Route of Infection**

477 (A-B) Stool (A) and blood (B) were collected at the timepoints shown from conventional (black)  
478 and GF mice (colored) inoculated with the virus shown. Viral titers were quantified by plaque  
479 assay or qPCR. Symbols indicate individual samples. Lines pass through the mean at each  
480 timepoint. Shadowed areas indicate the SEM. Gray areas indicate the limit of detection. N = 4-8  
481 mice per condition, combined from two independent experiments.

482 (C) Neutralizing antibodies in the sera of mice 28 days post-inoculation (dpi) inoculated with RRV  
483 were quantified by a plaque-reduction neutralization assay. Reduction in plaque-forming units  
484 (PFU) is shown as percent relative to control sera from naïve conventional mice. Results are from  
485 3-9 mice from three independent experiments. n.d.: not determined.

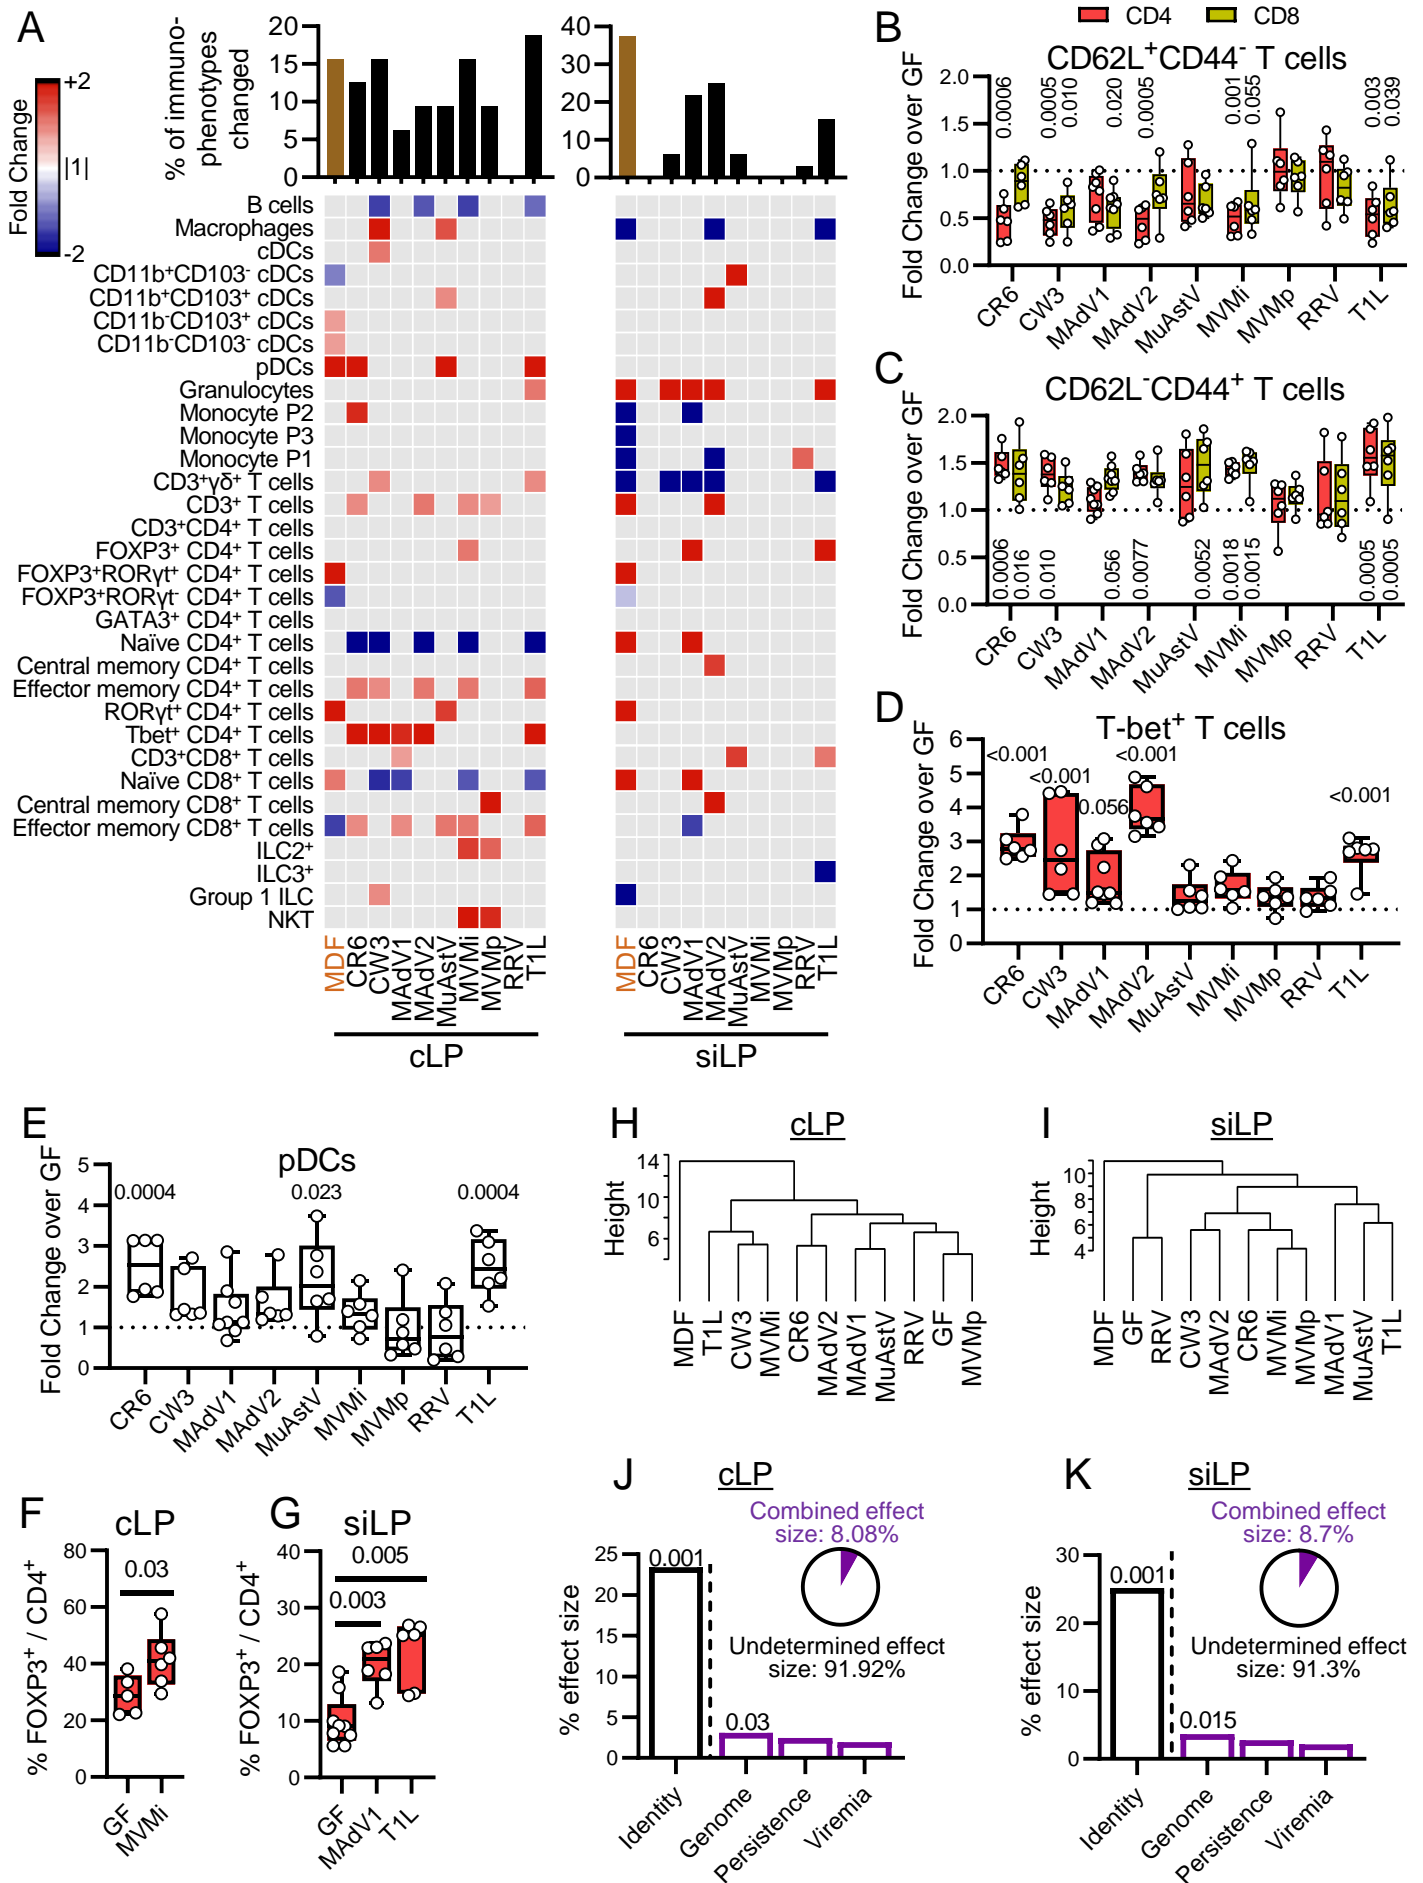

**Figure 2**

486 **Figure 2. Enteric Viruses Promote Changes in Immune Cell Populations**

487 (A) Heatmap showing average fold-change for cLP and siLP immune populations identified by  
488 flow cytometry (using the gating strategy in Fig. S2) for mice inoculated with individual viruses  
489 or MDF relative to GF controls with an FDR<0.1. Gray: FDR>0.1. Bar graph on top represents  
490 the proportion of immune populations with an FDR<0.1 and a fold change>1.5.

491 (B-E) Fold changes of CD62L<sup>+</sup>CD44<sup>-</sup> (B), CD62L<sup>-</sup>CD44<sup>+</sup> (C), T-bet<sup>+</sup> (D), and pDCs (E) in the  
492 cLP CD4<sup>+</sup> (B-D), CD8<sup>+</sup> (B-C), or CD45<sup>+</sup> (E) populations. Each dot represents a single sample.

493 (F-G) Percentage of Foxp3<sup>+</sup> cells in the cLP (F) or siLP (G) CD4<sup>+</sup> populations. Each dot represents  
494 a single sample.

495 (H-I) Hierarchical clustering of the different conditions based on cLP (H) and siLP (I) population  
496 frequencies.

497 (J-K) Effect size determined by db-RDA of viral characteristics: *identity*, *genome*, *persistence*, and  
498 *viremia* as explanatory variables of the cLP (J) and siLP (K) population frequency variance. Pie  
499 charts represent the combined effect size of *genome*, *persistence*, and *viremia*.

500 Statistical significance was calculated by one-way ANOVA followed by Dunn's post-hoc analysis  
501 and corrected for multiple testing by the Benjamini-Hochberg procedure (A-E) or by non-  
502 parametric Mann-Whitney test (F-G).

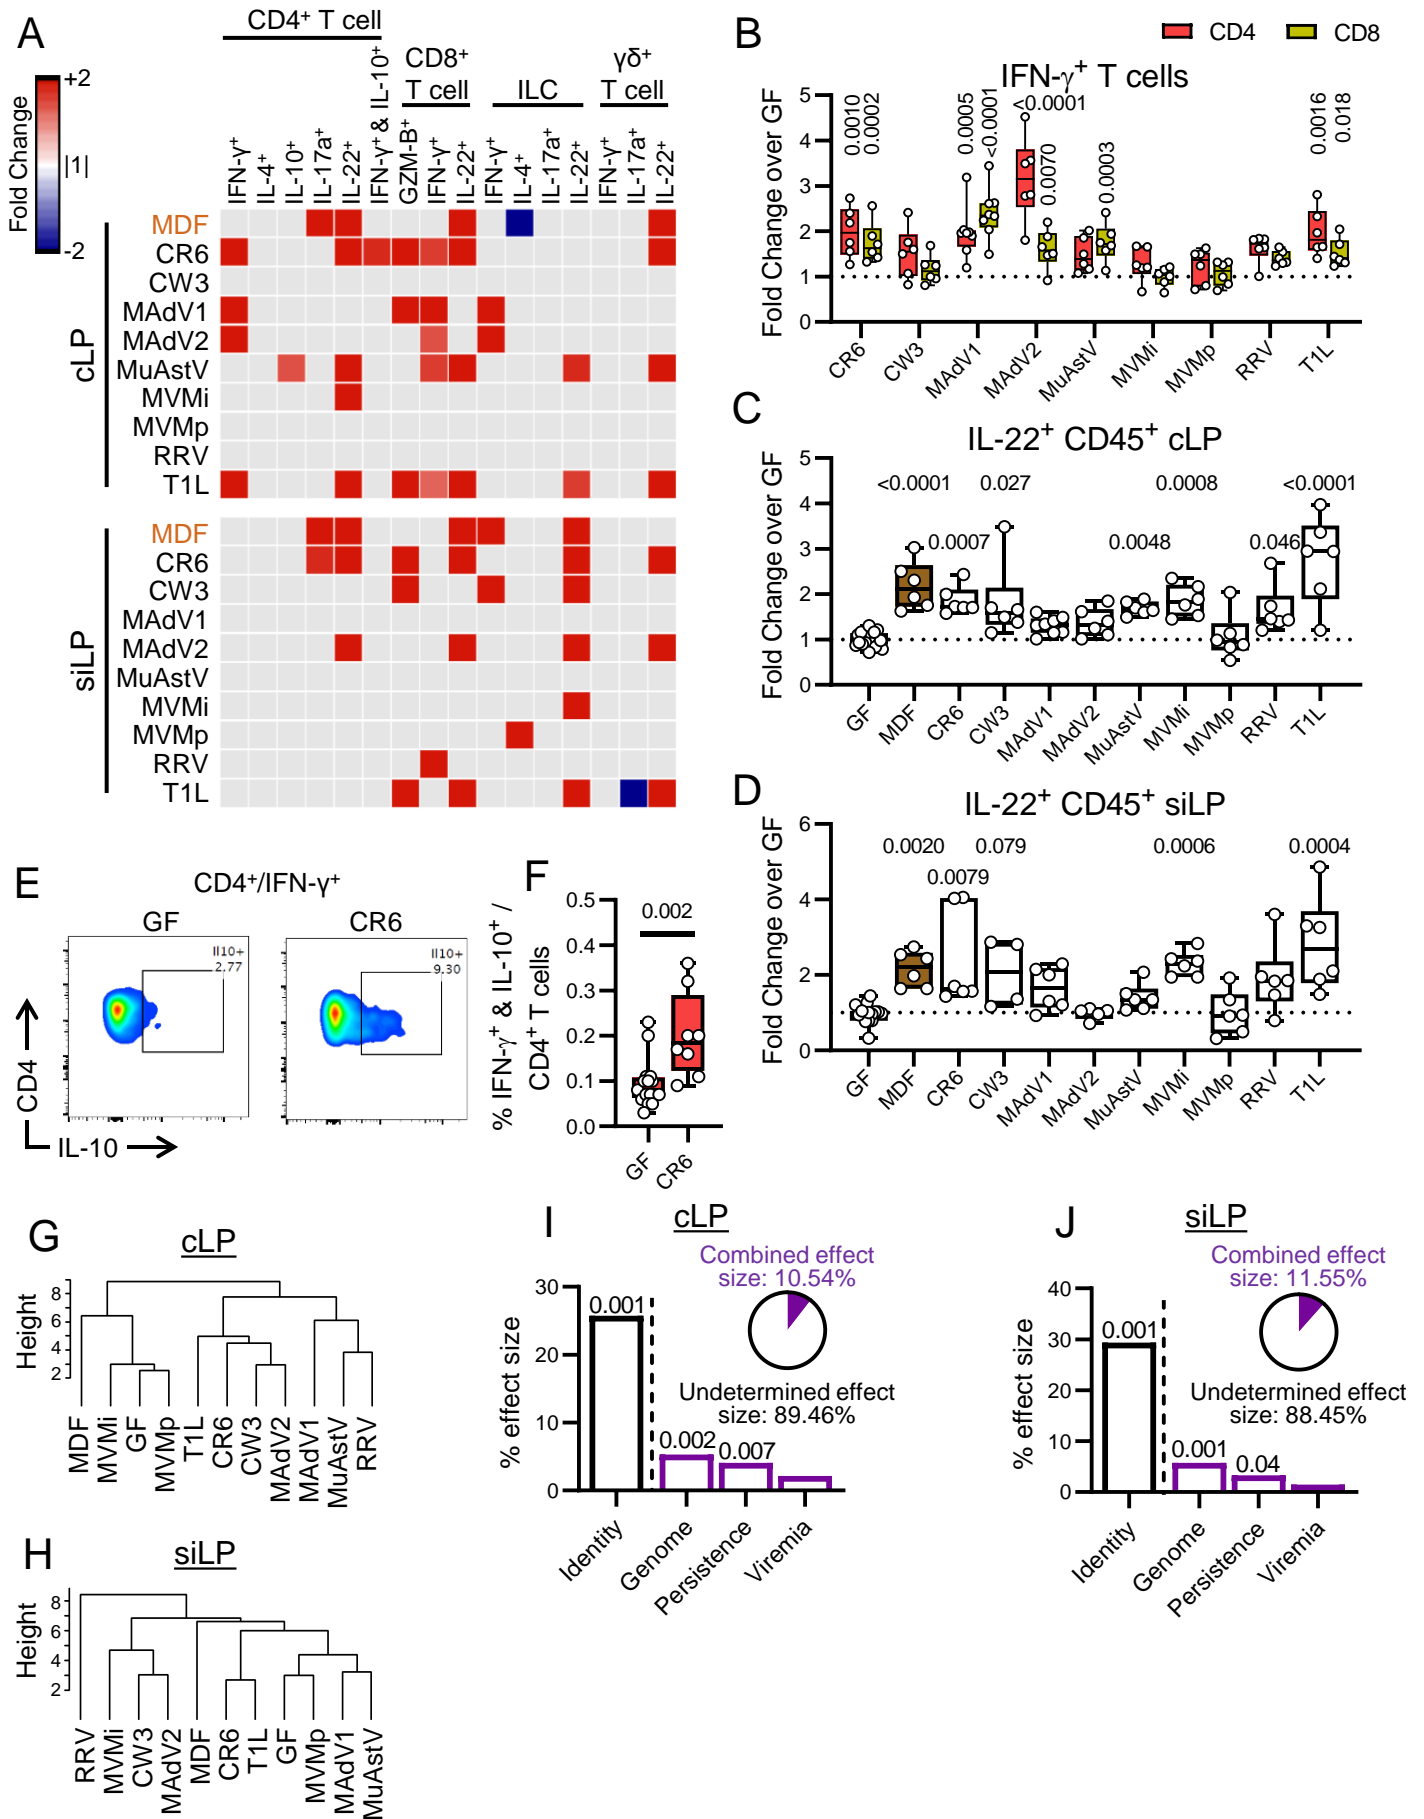

**Figure 3**

503 **Figure 3. Enteric Viruses Increase Cytokine Production by Immune Cells**

504 (A) Heatmaps showing average fold-change for cytokine-producing immune cells in cLP and siLP  
505 identified by flow cytometry for mice inoculated with the viruses shown or MDF relative to GF  
506 controls with an FDR<0.1. Gray: FDR>0.1.

507 (B-D) Fold-changes of IFN- $\gamma$ <sup>+</sup> (B) and IL-22<sup>+</sup> (C-D) cells in the cLP CD4<sup>+</sup> and CD8<sup>+</sup> (B), cLP  
508 CD45<sup>+</sup> (C), and siLP CD45<sup>+</sup> (D).

509 (E-F) Representative dot plot (E) and percentage of IFN- $\gamma$ <sup>+</sup>IL-10<sup>+</sup> cells in the cLP CD4<sup>+</sup> T cell  
510 population (F).

511 (G-H) Hierarchical clustering of the different microbial associations based on the cLP (G) and  
512 siLP (H) cytokine production frequencies.

513 (I-J) Effect size determined by db-RDA of virus as explanatory variables of the cLP (J) and siLP  
514 (K) cytokine-producing immune cell frequency variance. Pie charts represent the combined effect  
515 size of *genome*, *persistence*, and *viremia*.

516 Statistical significance was calculated by one-way ANOVA followed by Dunn's post-hoc analysis  
517 and corrected for multiple testing by the Benjamini-Hochberg procedure (A-B), by Kruskal-Wallis  
518 test followed by Dunn's post-hoc analysis (C-D), or by non-parametric Mann-Whitney test (F).

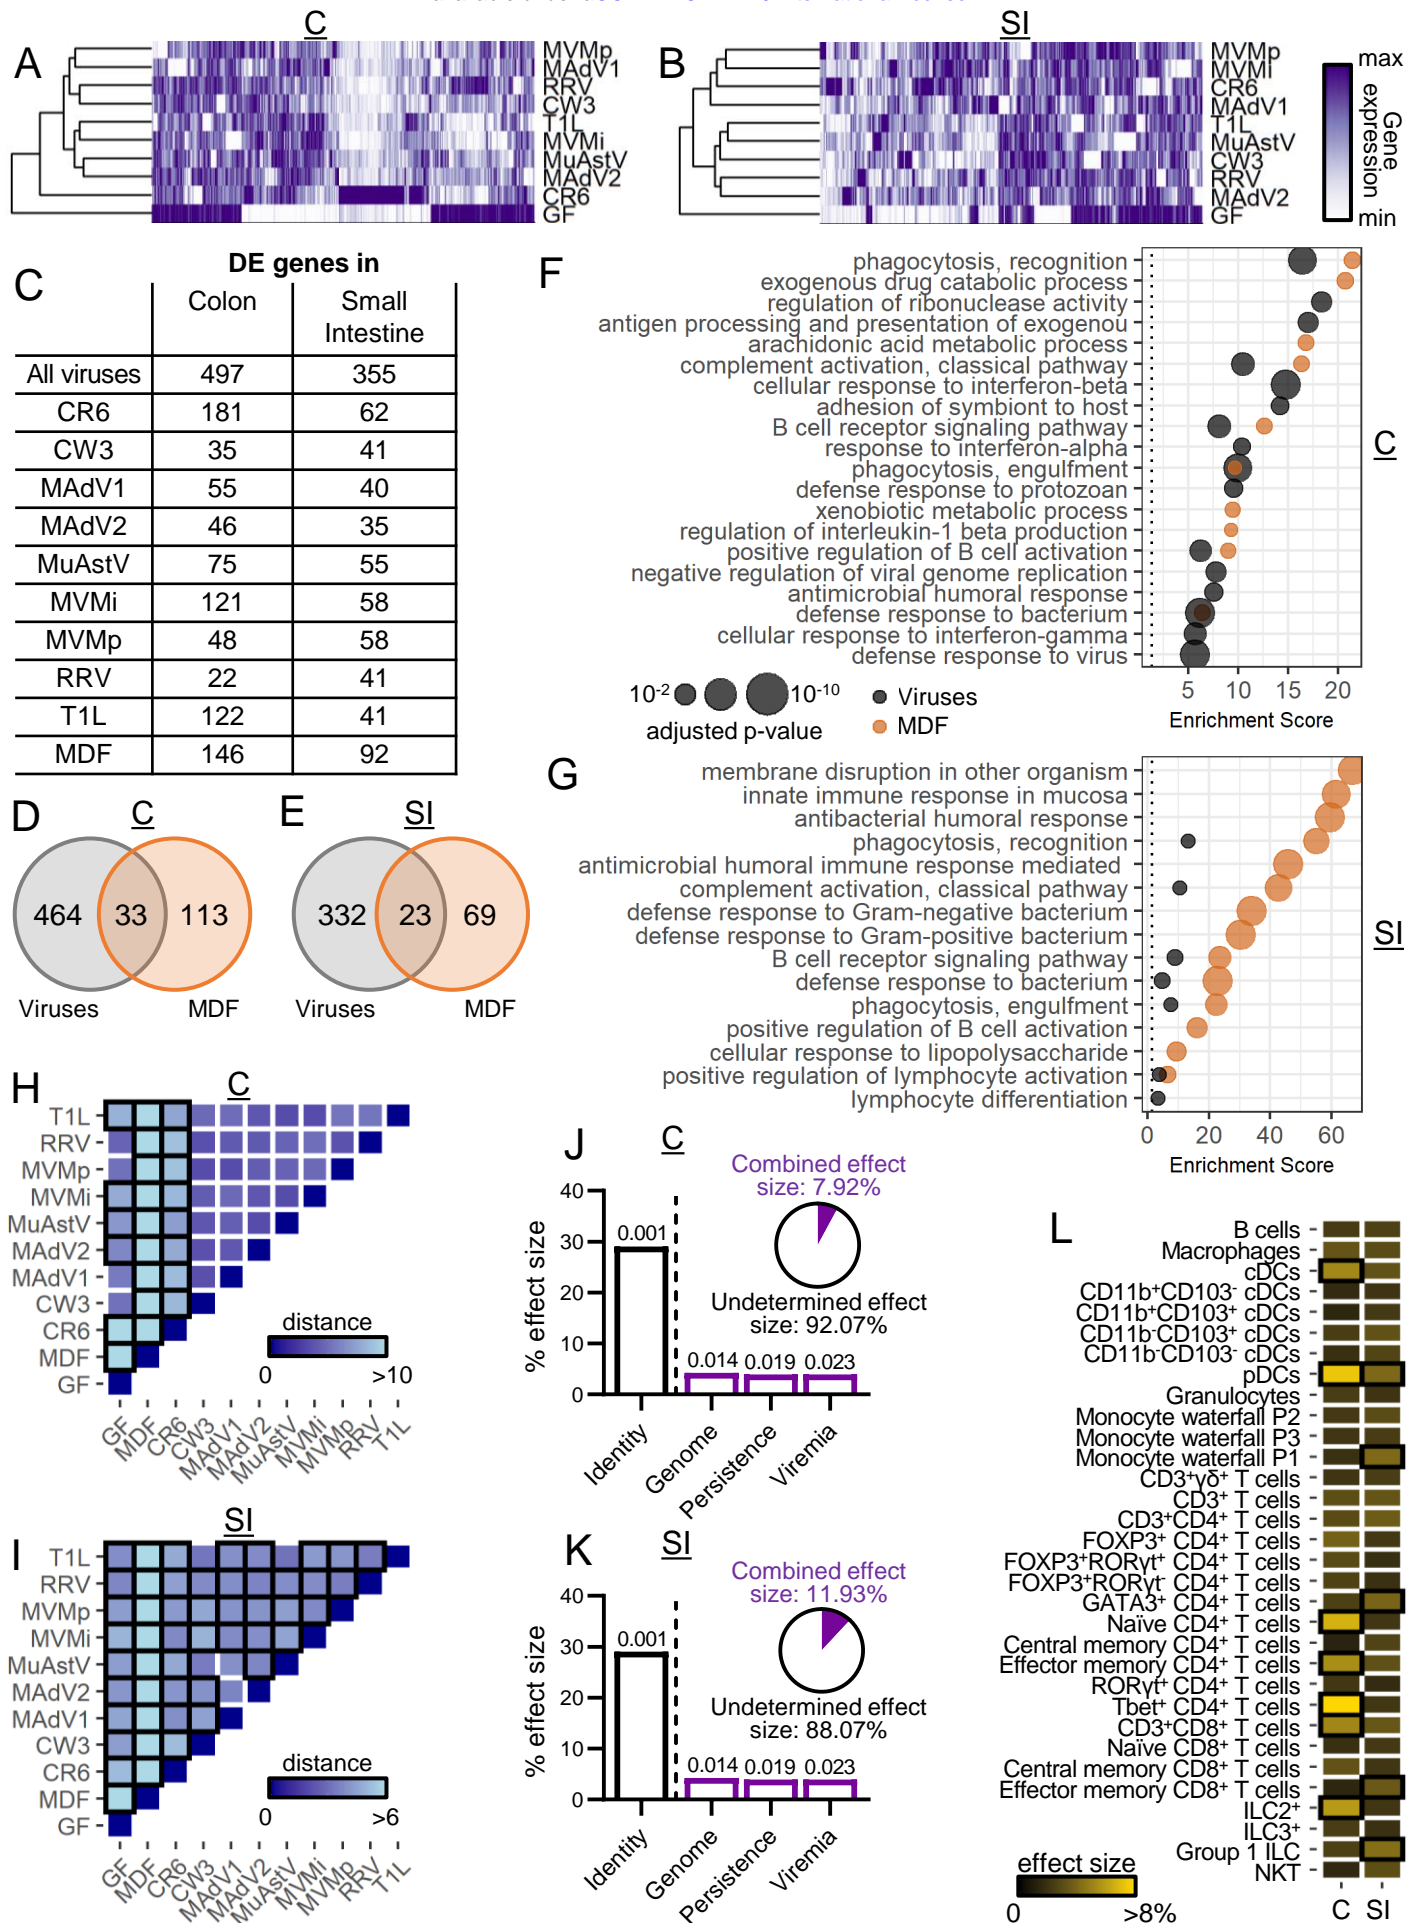

**Figure 4**

519 **Figure 4. Intestinal Transcriptome of Virus-Infected Mice**

520 (A-B) Heatmaps showing DE genes ( $|\text{average fold-change over GF}| \geq 2$  and unadjusted p-  
521 value  $\leq 0.01$ ) in the colon (A) and small intestine (B) of virus-infected mice compared with GF  
522 mice. C: colon; SI: small intestine.

523 (C) Number of DE genes in the colonic and small intestinal transcriptome for each condition  
524 compared with GF mice.

525 (D-E) Venn diagrams depicting the number and overlap of DE genes in all virus-infected and  
526 MDF-associated mice in the colon (D) and small intestine (E).

527 (F-G) Top 15 most highly enriched biological process GO terms for the DE genes in the colon (F)  
528 and small intestine (G) of virus-infected and MDF-associated mice.

529 (H-I) Heatmaps showing the Euclidean distances between group centroids of DE genes in the colon  
530 (H) and small intestine (I) comparing each condition. Boxes outlined in black indicate significant  
531 differences (PERMANOVA  $< 0.05$ ).

532 (J-K) Effect size determined by db-RDA of virus characteristics as explanatory variables of the  
533 DE gene variance in the colon (J) and small intestine (K). Pie charts represent the combined effect  
534 size of *genome*, *persistence*, and *viremia*.

535 (L) Effect size determined by db-RDA of immune population frequencies from Figure 2 on DE  
536 gene variance in the colon and small intestine. Boxes outlined in black indicate p-value  $< 0.05$ .



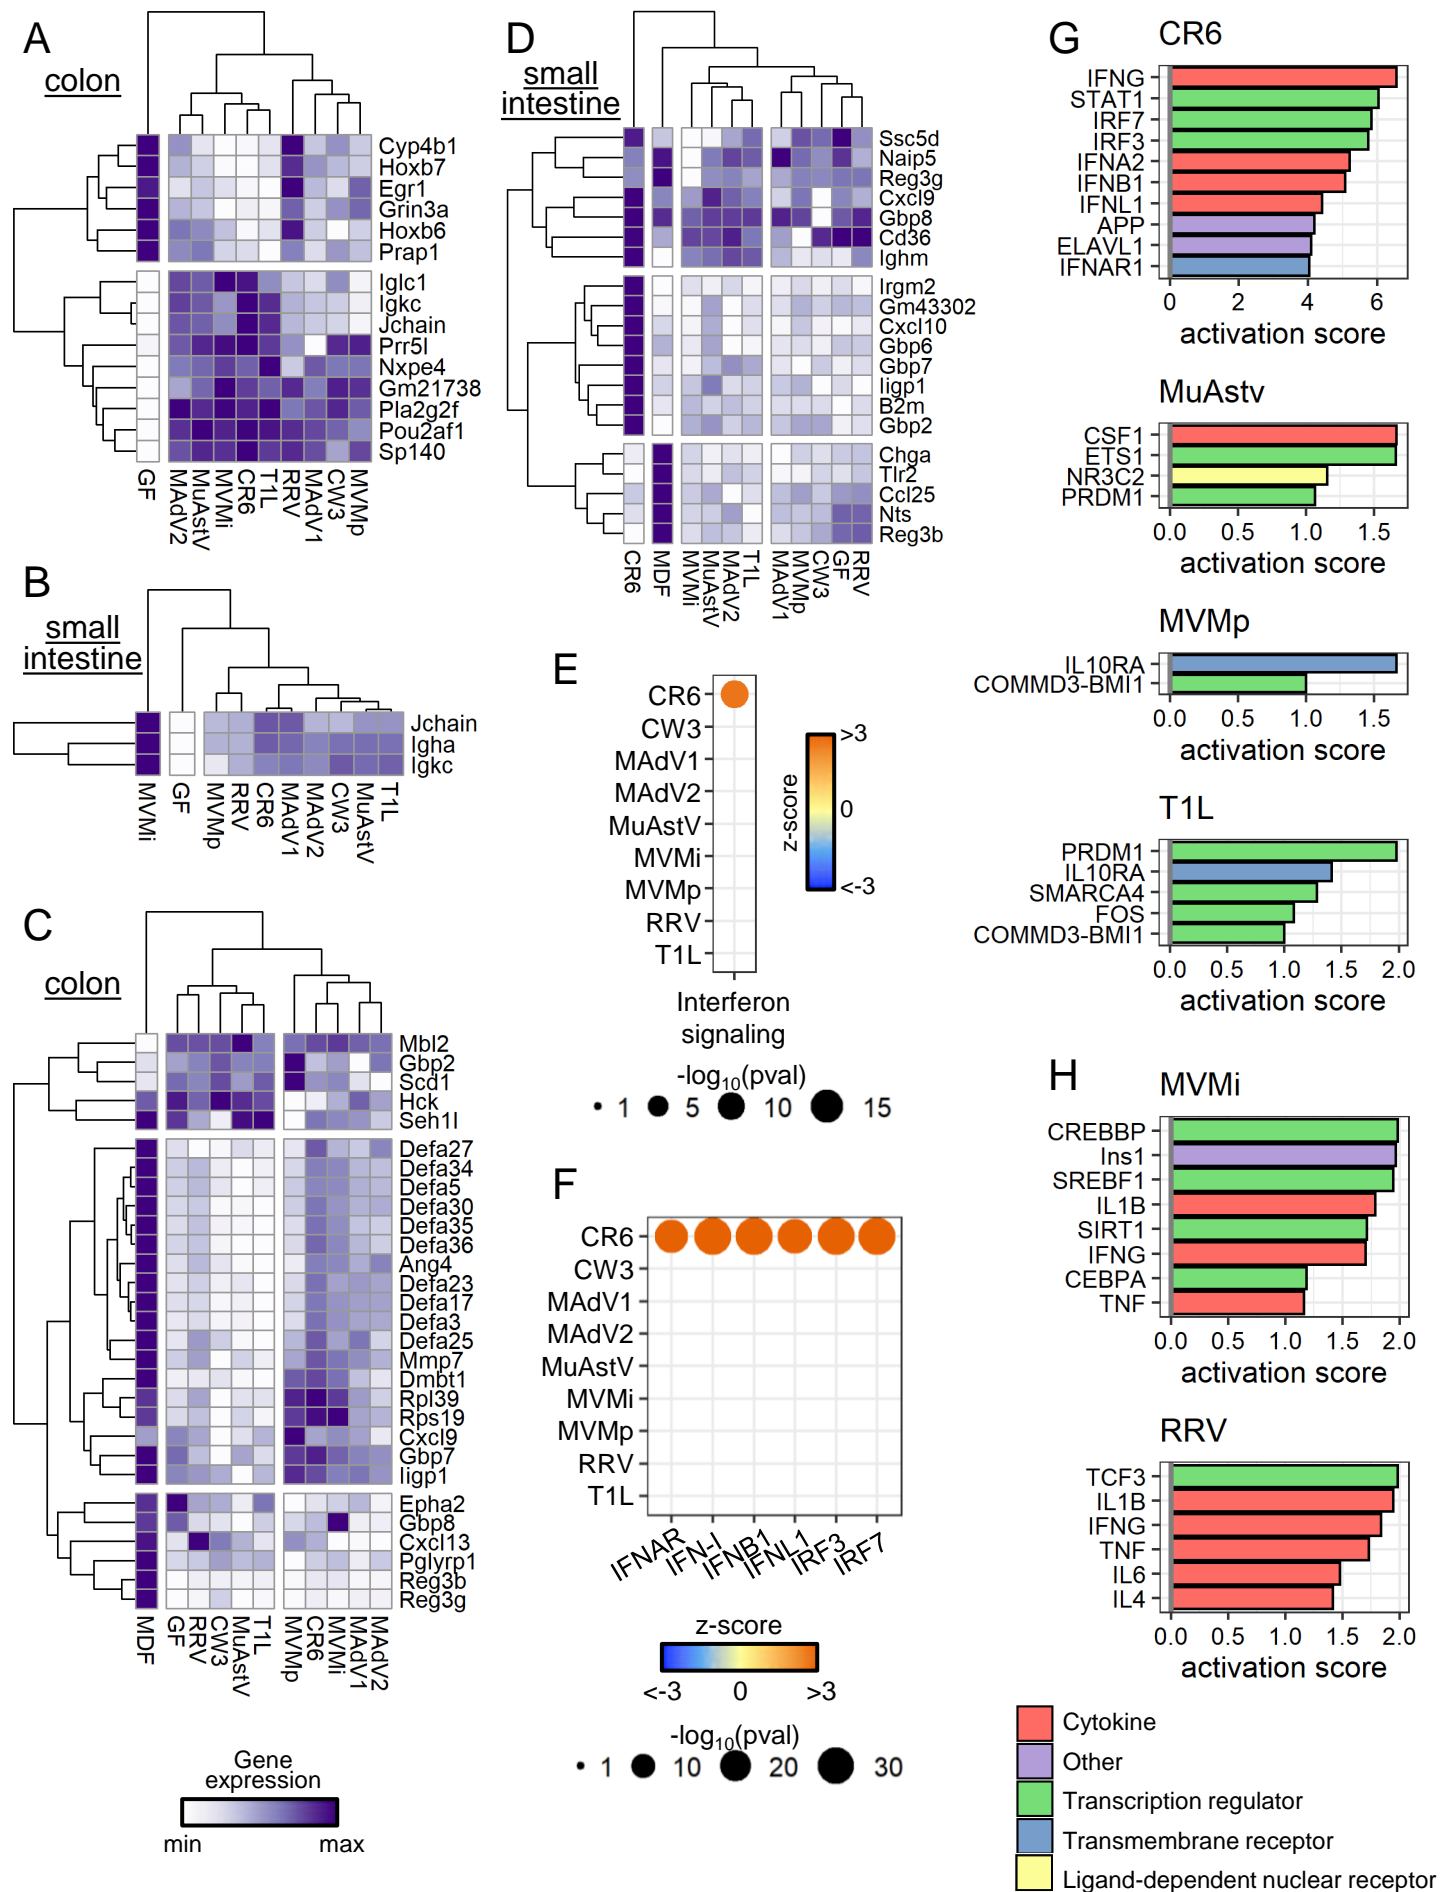

**Figure 5**

537 **Figure 5. Intestinal Gene Expression Common and Specific to Individual Viruses**

538 (A-B) Heatmaps displaying normalized expression values of DE genes (average fold-change over  
539  $GF \geq 2$  and unadjusted  $p\text{-value} \leq 0.01$ ) modulated by at least five viruses in the colon (A) and small  
540 intestine (B).

541 (C-D) Heatmaps displaying normalized expression values of DE genes (average fold-change over  
542  $GF \geq 1.5$  and unadjusted  $p\text{-value} \leq 0.01$ ) annotated in GO:0050829, GO:0050830, and GO:0061844  
543 in the colon (C) and small intestine (D).

544 (E-F) Ingenuity pathway analysis (IPA) of the colonic transcriptome of virus-infected mice for  
545 enrichment of DE genes involved in IFN signaling (E) or key molecules in the IFN pathway (F).

546 (G-H) Colonic (G) and small intestinal (H) DE genes were analyzed by IPA for upstream  
547 regulators. Top 10 upstream regulators for each virus with an activation score  $> 1$  are depicted.

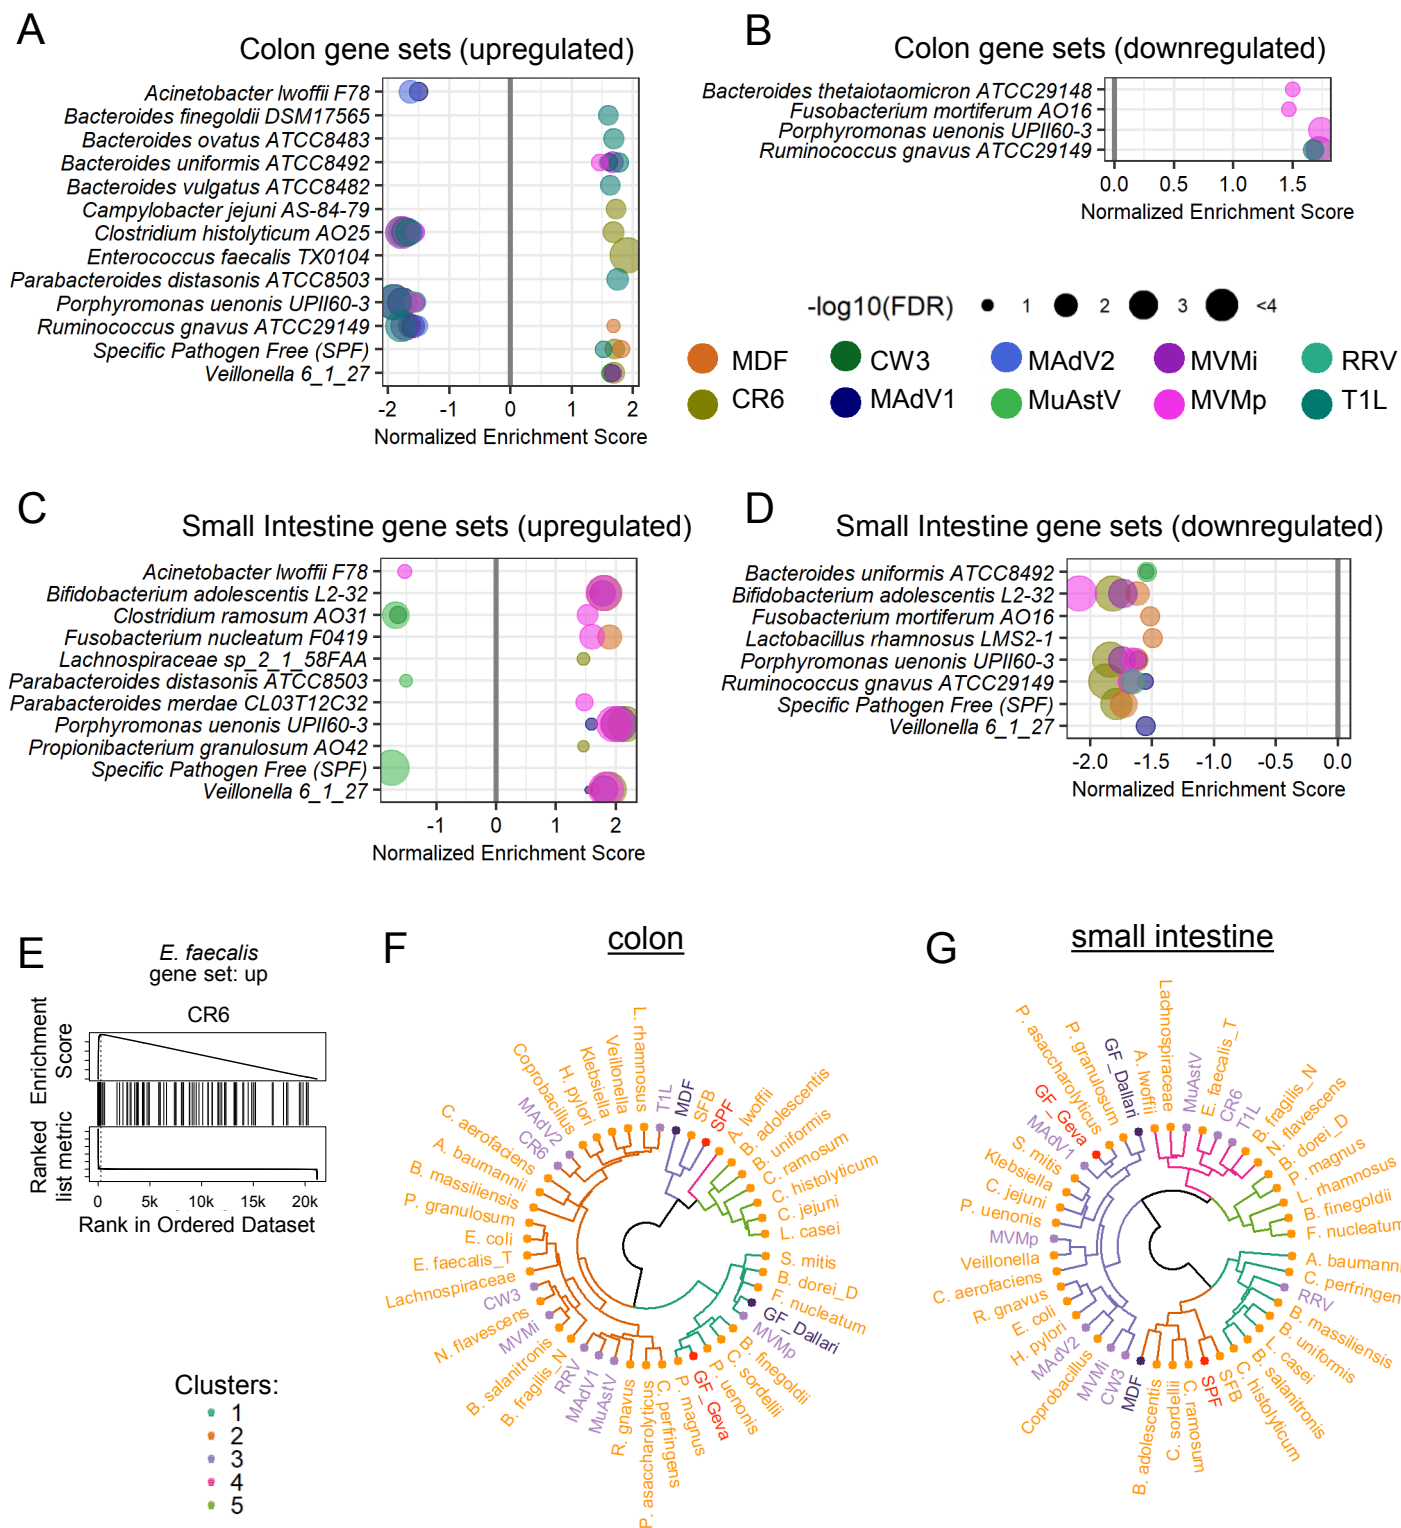

Figure 6

548 **Figure 6. Intestinal Transcriptomes of Virus-Infected Mice Are Enriched for Bacterial**  
549 **Microbiome Gene Signatures**

550 (A-D) Colonic (A-B) and small intestinal (C-D) transcriptomes from virus-infected mice compared  
551 with gene expression signatures of bacterially colonized mice by GSEA. Gene sets upregulated  
552 following colonization by bacteria are depicted in A and C; downregulated gene sets are depicted  
553 in B and D.

554 (E) GSEA plot showing enrichment of the *E. faecalis* upregulated gene set in the colonic  
555 transcriptome of mice infected with MNV CR6.

556 (F-G) Hierarchical clustering of the immune population frequencies described in Table S4. Purple:  
557 viruses; dark purple: MDF and GF from this study; orange: bacteria; pink: conventional SPF and  
558 GF from Geva-Zatorsky et al.

| Viral family (-viridae) | Viral genus (-virus) | Baltimore classif. (genome) | Virus                     | Strain       | Abbr.  | Persistent | Viremia | Cause pathology |
|-------------------------|----------------------|-----------------------------|---------------------------|--------------|--------|------------|---------|-----------------|
| Adeno-                  | Mastadeno-           | I (dsDNA)                   | Murine Adenovirus         | MAdV1        | MAdV1  | Yes        | Yes     | No              |
|                         |                      |                             |                           | MAdV2        | MAdV2  | No         | No      | No              |
| Astro-                  | Mamastro-            | IV (ssRNA+)                 | Murine Astrovirus         | NYU1         | MuAstV | Yes        | Yes     | No              |
| Calici-                 | Noro-                | IV (ssRNA+)                 | Murine Norovirus          | CR6          | CR6    | Yes        | No      | No              |
|                         |                      |                             |                           | CW3          | CW3    | No         | No      | No              |
| Picornia-               | Entero-              | IV (ssRNA+)                 | Coxsackie virus B3        | H3           | CVB3   | n.d.       | n.d.    | Yes, lethal     |
| Parvo-                  | Protoparvo-          | II (ssDNA)                  | Minute virus of mice      | Immunotropic | MVMi   | Yes        | Yes     | No              |
|                         |                      |                             |                           | Prototype    | MVMp   | Yes        | No      | No              |
| Reo-                    | Orthoreo-            | III (dsRNA)                 | Mammalian orthoreovirus 1 | Type 1 Lang  | T1L    | No         | No      | No              |
|                         | Rota-                |                             | Simian rhesus rotavirus   | RRV          | RRV    | No         | No      | No              |

559 **Table 1: Summary of characteristics of viruses.** Taxonomic classification at the family and  
560 genus level, Baltimore classification, virus strain names with their abbreviations (Abbr.), and  
561 summary of results following inoculation of germ-free (GF) mice from Fig. 1 and S1 for each virus  
562 used in this study. Viruses were categorized as persistent if viral nucleic acid was detected at 30  
563 days post inoculation (dpi) in blood or stool following oral inoculation. Viremia is defined as the  
564 presence of viral nucleic acid in the blood in at least one time point. The ability to cause pathology  
565 is based on the appearance of histological or macroscopic signs of disease, such as lethality or  
566 diarrhea. n.d.: not determined.

## 567 **Material and methods**

### 568 Mice

569 GF C57BL/6J were bred in flexible-film isolators at the New York University Grossman School  
570 of Medicine Gnotobiotics Animal Facility. Absence of fecal bacteria was confirmed monthly by  
571 evaluating the presence of 16S DNA in stool samples by qPCR as previously described (Kernbauer  
572 et al., 2014). For experiments, GF mice were housed in Bioexclusion cages (Tecniplast) with  
573 access to sterile food and water. Conventional C57BL/6J and *Rag1*<sup>-/-</sup> mice were purchased from  
574 The Jackson Laboratory (Bar Harbor, ME, USA). Experiments depicted in Fig. 1 were performed  
575 using GF mice from both sexes and conventional male mice. Experiments depicted in Fig. 2-5  
576 were performed using GF female mice. Each independent experiment comprised 8-12 mice and  
577 untreated GF mice were included in each round. Each microbial association was evaluated in 5-7  
578 mice from at least 2 independent experiments. Littermates were randomly assigned to the  
579 experimental groups and mice were never single-housed. All animal studies were performed  
580 according to protocols approved by the NYU Grossman School of Medicine Institutional Animal  
581 Care and Use Committee.

### 582 Virus production

583 MNV strains CR6 and CW3 stocks were prepared by transfecting 293T cells (ATCC) with  
584 plasmids containing the viral genome (described in (Sutherland et al., 2018)) using X-  
585 tremeGENE™ HP DNA Transfection Reagent (Roche, Indianapolis, IN, USA). Supernatants were  
586 applied to RAW264.7 cells (ATCC) for two rounds of amplification, followed by  
587 ultracentrifugation of the supernatant and resuspension in endotoxin-free PBS (Corning, Corning,  
588 NY, USA) to generate viral stocks. Concentration of stock was determined by plaque assay  
589 (described below) on RAW264.7 cells overlaid with DMEM (Corning) + 1% methylcellulose  
590 (Sigma-Aldrich, St. Louis, MO, USA) and evaluated 3 days later using crystal violet.

591 CVB3 strain H3 stock was prepared by transfecting HeLa cells (ATCC) with plasmids containing  
592 the viral genome and the T7 polymerase, a gift from Dr. Pfeiffer J (UT Southwestern, Dallas, TX,  
593 USA), using Lipofectamine 3000 (Thermo Fisher Scientific, Rochester, NY, USA). Cell lysate  
594 was applied to HeLa cells for two rounds of amplification. Then, the cell lysate was resuspended  
595 in PBS + 1 mM MgCl<sub>2</sub> and 1 mM CaCl<sub>2</sub>, and freeze/thawed, and the supernatant was collected  
596 and used as viral stock. Stock titer was determined by plaque assay (described below) on HeLa

597 cells overlaid with MEM (Lonza, Walkersville, MD, USA) + 0.5% agarose (Thermo Fisher  
598 Scientific, Waltham, MA, USA) and evaluated 3 days later using crystal violet.

599 MAdV1, MAdV2, and CMT93 cells were a gift from Dr. Smith JG (University of Washington,  
600 Seattle, WA, USA). Viruses were expanded on CMT93 cells and supernatants were collected and  
601 used as viral stocks. Concentration of stocks were determined by focus forming assay (described  
602 below) on CMT93 cells.

603 MuAstV-NYU1 stock was generated from the stool of Rag1<sup>-/-</sup> mice bred at NYU Grossman School  
604 of Medicine. Briefly, stools from 6-10 weeks old mice were harvested and homogenized in PBS.  
605 Fecal slurry was pelleted, and supernatant was filtered twice using 0.22 µm Millex-GP syringe-  
606 driven filter unit (MilliporeSigma, Burlington, MA, USA). Viral titer was determined by qPCR after  
607 RNA extraction and retrotranscription.

608 MVMi and MVMp were a gift from Dr. Pintel D (University of Missouri, Columbia, MO, USA),  
609 and NB324K cells were a gift from Dr. Tattersall P (Yale University, New Haven, CT, USA).  
610 Viruses were expanded on NB324K cells and either cell lysate (MVMp) or supernatant (MVMi)  
611 were used as viral stocks. Concentration of stocks were determined by focus forming assay  
612 (described below) on NB324K cells.

613 RRV and MA-104 cells were a gift from Dr. Greenberg HB (Stanford University, Stanford, CA,  
614 USA). Virus was expanded on MA-104 cells and supernatant was collected and used as viral stock.  
615 Concentration of stock was determined by plaque assay (described below) on MA-104 cells  
616 overlaid with M199 (Sigma-Aldrich) + 0.5% agarose and evaluated 5 days later using neutral red.  
617 Reovirus T1L was prepared as described (Sutherland et al., 2018). T1L was quantified by plaque  
618 assay using L929 cells overlaid with DMEM containing 1% agar and evaluated 6 days later  
619 following neutral red staining (Sutherland et al., 2018).

## 620 Viral inoculation

621 Viruses were administered to mice by oral gavage at about 5 weeks of age. Doses administered  
622 were 3x10<sup>6</sup> PFU/mouse for MNV CR6 and CW3; 1x10<sup>7</sup> PFU/mouse for CVB3; 1x10<sup>6</sup> FFU/mouse  
623 for MAdV1; 5x10<sup>4</sup> FFU/mouse for MAdV2; 1x10<sup>10</sup> genome copies/mouse for MuAstV; 2x10<sup>5</sup>  
624 FFU/mouse for MVMi; 5x10<sup>6</sup> FFU/mouse for MVMp; 2x10<sup>7</sup> PFU/mouse for RRV; 1x10<sup>8</sup>  
625 PFU/mouse for T1L. For experiments depicted in Fig. 1 stool and blood were collected before  
626 viral inoculation and at 2, 5, 10, 30 and 60 days after inoculation. For experiments depicted in Fig.

627 2-5, stool was collected before viral inoculation and at 5 and 28 days after inoculation, whereas  
628 blood was collected 28 days after inoculation.

#### 629 Sample processing and nucleic acid extraction

630 Stool samples were homogenized in PBS for nucleic acid extraction by mechanical disruption with  
631 zircon beads (BioSpec Products, Bartlesville, OK, USA) using a FastPrep-24 machine (MP  
632 Biomedicals, Solon, OH, USA). Lysate slurry was spun down at 2000 g, 5 min, 4°C and the  
633 supernatant was spun down again at 8000 g, 5 min, 4°C to completely remove debris. Colon and  
634 small intestine segments were mechanically disrupted in PBS with metal beads (Qiagen) using a  
635 FastPrep-24 machine. Subsequently, lysate slurry was spun down at 8000 g, 5 min, 4°C to remove  
636 debris and a portion of the supernatant was used for RNA extraction. DNA was purified using  
637 DNeasy Blood & Tissue Kits (Qiagen) according to the manufacturer's protocol. RNA was  
638 purified using RNeasy extraction kits (Qiagen) with a DNase (Qiagen) incubation step according  
639 to the manufacturer's protocol. 200 µL of stool PBS homogenate and 50 µL of blood were used  
640 for nucleic acid extraction. cDNA was synthesized using ProtoScript First Strand cDNA Synthesis  
641 Kit (NEB) using random primers according to the manufacturer's protocol. All cDNA products  
642 were stored at -20 °C.

#### 643 Viral quantification

644 For plaque assays, samples were serially diluted in PBS or DMEM and 500 µL were used to  
645 overlay almost confluent cells in 6 well plates (Corning). Cells were incubated at 37°C and gently  
646 shaken every 15 minutes. After 1 h, inoculum was removed, and cells were overlaid with the semi-  
647 solid media described above. After the number of days indicated above, cells were either fixed by  
648 adding PBS + 4% PFA (Sigma-Aldrich) for 1 h and then stained with crystal violet or incubated  
649 ON with PBS + 0.05% Neutral Red (Sigma, St Louis, MO, USA) and fixed with PBS + 4% PFA  
650 for 1 h.

651 For focus forming assays, samples were serially diluted in PBS or DMEM and 50 µL were used  
652 to overlay almost confluent cells in a 96 multi-well clear-bottom black plate (Corning). Cells were  
653 incubated at 37°C and gently shaken every 15 minutes. After 1 h, inoculum was removed and cells  
654 were overlaid with DMEM + 10% fetal bovine serum (GE Healthcare Life Science, Piscataway,  
655 NJ, USA). After 1 day, cells were fixed with HyClone Water (GE Healthcare Life Science) + 2%  
656 PFA for 20 min on ice, and then permeabilized with a quench/perm buffer (20 mM glycine, 0.25%  
657 TX-100 in PBS) for 20 min on ice. Cells were then stained with a primary antibody for 1 h on ice.



658 Anti-adenovirus antibody clone 8C4 (Fitzgerald Industries) was used to detect MAdV1 and  
659 MAdV2), and a non-commercial  $\alpha$ -MVM NS protein antibody previously described (Yeung et al.,  
660 1991, a gift from Dr. Tattersall P) was used to detect MVM. Then, we stained for 15 min on ice  
661 with a secondary  $\alpha$ -mouse IgG AF488 (Thermo Fisher Scientific) and DAPI (Sigma-Aldrich).  
662 Plates were imaged using an EVOS Cell Imaging System (Thermo Fisher Scientific) and focus  
663 forming units were manually enumerated using ImageJ (NIH).  
664 Quantification of viral nucleic acid was performed on DNA and cDNA samples using LightCycler  
665 480 SYBR Green I Master or LightCycler 480 Probes Master (Roche), and absolute amount was  
666 calculated by comparison with in-house linearized plasmid standards. Primer and probe sequences  
667 are reported in Table S5.

#### 668 Plaque reduction neutralization test

669 Serum was recovered from blood collected from the submandibular vein at 20-30 days after viral  
670 inoculation. Serum inactivated for 30 min at 56°C was diluted in PBS and the same amount of  
671 virus was added to all conditions before 1 h incubation at 37°C. Then, this mix was used as  
672 inoculum for plaque assay and focus forming assay, which were performed as previously  
673 described.

#### 674 Organ processing

675 Colon, small intestine, mesenteric lymph nodes, lungs, and spleen were harvested from untreated  
676 GF mice or GF mice 28 days after inoculation with viruses and bacteria.

677 A segment of the distal colon (4 mm long and 3 cm away from the rectum) and three segments of  
678 the midsection of the duodenum, jejunum, and ileum (each 2 mm long) were collected and kept at  
679 -80°C until RNA isolation. Additionally, 3 mm from the distal colon and from the ileum were  
680 collected and fixed in formalin (Thermo Fisher Scientific) for histological analysis.

681 For single cells suspension, small intestinal and colonic tissues were flushed with PBS, fat and  
682 Peyer's patches were removed, and the tissues were incubated first with 20 mL of HBSS (Gibco)  
683 with 2% HEPES (Corning), 1% sodium pyruvate (Corning), 5mM EDTA, and 1 mM dithiothreitol  
684 (Sigma-Aldrich) for 15 min at 37°C, and then with new 20 mL of HBSS with 2% HEPES, 1%  
685 sodium pyruvate, 5mM EDTA for 10 min at 37°C. Tissue bits were washed in HBSS + 5% FCS,  
686 minced, and then enzymatically digested with collagenase D (0.5 mg/mL, Roche) and DNase I  
687 (0.01 mg/mL, Sigma-Aldrich) for 30-45 min at 37°C with constant stirring. Digested solutions

688 were passed through 70  $\mu\text{m}$  cell strainers (BD) and cells were subjected to gradient centrifugation  
689 using 40% Percoll (Sigma-Aldrich).

690 IELs were recovered from the liquid phase of the first small intestine incubation, washed with  
691 PBS, and subjected to gradient centrifugation using 40% Percoll.

692 mLNs were collected and passed through 100  $\mu\text{m}$  cell strainers and resuspended in PBS.

693 Lungs and spleens were grossly minced and enzymatically digested with collagenase D (0.5  
694 mg/mL) and DNase I (0.01 mg/mL) for 20-30 min at 37°C. Digested solutions were passed  
695 through 100  $\mu\text{m}$  cell strainers, resuspended in ACK buffer to lyse the red blood cells, and  
696 resuspended in PBS.

697 For the analysis of the cytokine production, cells were plated in RPMI with 10% FBS and treated  
698 with phorbol 12-myristate 13-acetate (50 ng/mL, MilliporeSigma) and ionomycin (1  $\mu\text{g}/\text{mL}$ ,  
699 MilliporeSigma) in the presence of *GolgiStop* (BD) and *GolgiPlug* (BD) for 4 h at 37°C.

#### 700 Flow Cytometry

701 Cells were pre-incubated with CD16/CD32 Fc block (BD PharMingen). Surface and intracellular  
702 cytokine staining was performed per manufacturer's instructions in PBS + 2% FBS for 20 min on  
703 ice. Three staining panels were utilized. The first panel included antibodies against BST2, NK1.1,  
704 THY1.2, F4/80, CD103, LY6C, CD11b, MHC-II, CD45, CD11c, CD19, CD64, and B220. To  
705 stain the spleen samples, we substituted CD103 with CD8a for a better evaluation of the dendritic  
706 cell subsets. The second panel included antibodies against GATA3, CD11b, CD11c, GR1, CD19,  
707 TER119, Tbet, TCR $\gamma\delta$ , FOXP3, CD8, CD4, ROR $\gamma\text{t}$ , CD62L, CD127, NK1.1, CD44, CD3 $\epsilon$ , CD45.  
708 The third panel included antibodies against IFN- $\gamma$ , CD11b, CD11c, GR1, CD19, TER119, Nk1.1,  
709 IL-22, TCR $\gamma\delta$ , GRANZYME B, IL-17a, CD8, CD4, IL-10, CD127, IL-4, CD3E, CD45. Samples  
710 were fixed with either Fixation Buffer (Biolegend, San Diego, CA, USA) or eBioscience  
711 Foxp3/Transcription Factor Staining Buffer Set (Thermo Fisher Scientific). For intracellular  
712 staining of transcription factor, cells were permeabilized with the eBioscience  
713 Foxp3/Transcription Factor Staining Buffer Set at room temperature for 30 min in the presence of  
714 antibodies. For intracellular staining of cytokines, cells were permeabilized with Intracellular  
715 Staining Permeabilization Wash Buffer (Biolegend) at room temperature for 30 min in the  
716 presence of antibodies. Zombie UV Fixable Viability Kit (Biolegend) was used to exclude dead  
717 cells. Samples were acquired on a BD LSR II (BD Biosciences) and analyzed using FlowJo  
718 software (Treestar, Inc., Ashland, OR, USA).

719 RNA deep sequencing

720 CEL-seq2 was performed on 67 colonic and 60 small intestinal RNA samples. Sequencing was  
721 performed on Illumina NovaSeq 6000 (Illumina). All samples from the same organs were  
722 sequenced together, thus no correction for batch effect was necessary.

723 Microscopy on intestinal tissue

724 Small intestinal and colonic tissues were cut open along the length, pinned on black wax, and fixed  
725 in 10% formalin. Tissues were embedded in 3% low melting point agar (Promega, Madison, WI,  
726 USA). Formalin embedding, cutting, and hematoxylin and eosin staining was performed by the  
727 NYU Histopathology core. Sections were imaged either on a Leica SCN400 F microscope (Leica  
728 Biosystems, Buffalo Grove, IL, USA).

729 Bacteria

730 The Minimal Defined Flora consisted of the 15 bacteria described in Brugiroux et al., 2016.  
731 *Akkermansia muciniphila* YL44 was a gift from Dr. McCoy K (University of Calgary, Canada)  
732 and it was grown in 0.1% mucin (Sigma-Aldrich), anaerobic, 37°C. *Bacteroides caecimuris* I48  
733 was from DSMZ and it was grown in BHI (Anaerobe Systems,), anaerobic, 37°C. *Muribaculum*  
734 *intestinale* YL27 (DSMZ) was grown in chopped meat media (Anaerobe Systems), anaerobic,  
735 37°C. *Turicimonas muris* was a gift from Dr. McCoy K and it was grown in BHI, anaerobic, 37°C.  
736 *Escherichia coli* Mt1B1 (DSMZ) was grown in LB (Sigma-Aldrich), aerobic, 37°C.  
737 *Bifidobacterium longum* subsp. *animalis* YL2 (DSMZ) was grown in BHI, anaerobic, 37°C.  
738 *Staphylococcus xylosus* 33ERD13C (DSMZ) was grown in TSB-yeast (Sigma Aldrich), aerobic,  
739 37°C. *Streptococcus danieliae* ERD01G (DSMZ) was grown in TSB-yeast, microaerophilic, 37°C.  
740 *Enterococcus faecalis* KB1 (DMSZ) was grown in TSB-yeast, aerobic, 30°C. *Acutalibacter muris*  
741 KB18 (DSMZ) was grown in BHI, anaerobic, 37°C. *Clostridium clostridioforme* YL32 (DSMZ)  
742 was grown in PYG (Anaerobe Systems), anaerobic, 37°C. *Flavinofractor plautii* YL31 (DSMZ)  
743 was grown in PYG, anaerobic, 37°C. *Blautia coccooides* YL58 (DSMZ) was grown in chopped  
744 meat media, anaerobic, 37°C. *Lactobacillus reuteri* I49 (DMSZ) was grown in MRS,  
745 microaerophilic, 37°C. *Clostridium innocuum* I46 (DSMZ) was grown in chopped meat media or  
746 PYG, anaerobic, 37°C.  
747 *Yersinia Pseudotuberculosis* was a gift from Dr. Darwin A (NYU), and it was grown overnight in  
748 Luria-Bertani broth with shaking at 28°C. In the morning, the bacterial were subcultured in fresh  
749 Luria-Bertani broth with shaking at 28°C until OD 0.7-0.9. Bacterial density was confirmed by

750 dilution plating. 9-week-old female GF mice were inoculated by oral gavage with  $2 \times 10^4$  CFU  
751 resuspended in 200  $\mu$ l PBS. Severity of disease was quantified through a scoring system in which  
752 individual mice received a score of 1 in case of the presence of visible blood in the stool, and  
753 between 0 and 2 of the following: hunched posture and diarrhea.

## 754 **Quantification and statistical analysis**

### 755 Immunophenotypes

756 Flow cytometry fold change values were calculated by dividing the frequency of a given cell type  
757 by the average frequency obtained from the GF mice in the same experimental round. Statistical  
758 differences between each colonization condition and the GF mice were calculated by one-way  
759 ANOVA followed by Dunn's post-hoc analysis using the R package "stats". To control for  
760 multiple testing, a false discovery rate was calculated by the Benjamini-Hochberg procedure using  
761 the R package "stats" for each cell type analyzed.

### 762 Selection of differentially expressed genes

763 RNA-Seq results were processed using the R package "DESeq2" to obtain variance stabilized  
764 count reads, fold changes relative to GF condition, and statistical p-value. Analysis of the whole  
765 tissue transcriptome focused on differentially expressed genes, defined as the genes with an  
766 absolute fold change relative to GF  $>2$  and an unadjusted p-value  $<0.01$ .

### 767 Computational analysis

768 Hierarchical clustering of the population and cytokine frequencies were performed on the  
769 Euclidean distances using the R package "stats". Distance-based redundancy analysis (db-RDA)  
770 was used to determine the contribution of different factors to the variance observed within the  
771 immunophenotypes samples or differentially expressed genes using the R package "vegan".  
772 Euclidean distance between colonization conditions according to differentially expressed genes  
773 was calculated using the R package "stats", and permutational multivariate analysis of variance on  
774 these distances was calculated using the R package "vegan". Heatmaps were generated using either  
775 the package "ggplot2" or "pheatmap". Gene ontology analysis was performed using the package  
776 "clusterProfiler". GSEA was performed using the package "WebGestaltR". Canonical pathway  
777 and upstream regulators analysis were performed by uploading the differentially expressed genes  
778 to Ingenuity Pathway Analysis software (Qiagen).

779 GSEA gene signatures

780 GSEA gene signatures were generated in a manner similar to Godec et al., 2016 by selecting the  
781 top upregulated or downregulated genes, up to 200, with an FDR<0.02 or an unadjusted p-  
782 value<0.001. Gene signatures consisting of less than 10 genes were discarded. IL-22 and bacterial  
783 signatures were based on the transcriptional data described in Gronke et al., 2019 and Geva-  
784 Zatorsky et al., 2017, respectively.

785 Statistical analysis

786 Statistical differences were determined as described in figure legend using either R or GraphPad  
787 Prism 8 software (La Jolla, CA, USA).

788 Data and software availability

789 The extensive datasets presented in this manuscript are made available in Tables S1-S4. The  
790 immunophenotypes are presented in Table S1C as frequencies of cell types and in Table S1B as  
791 fold changes relative to uninfected GF mice. The accession number for the gene expression raw  
792 data reported in this paper is pending.

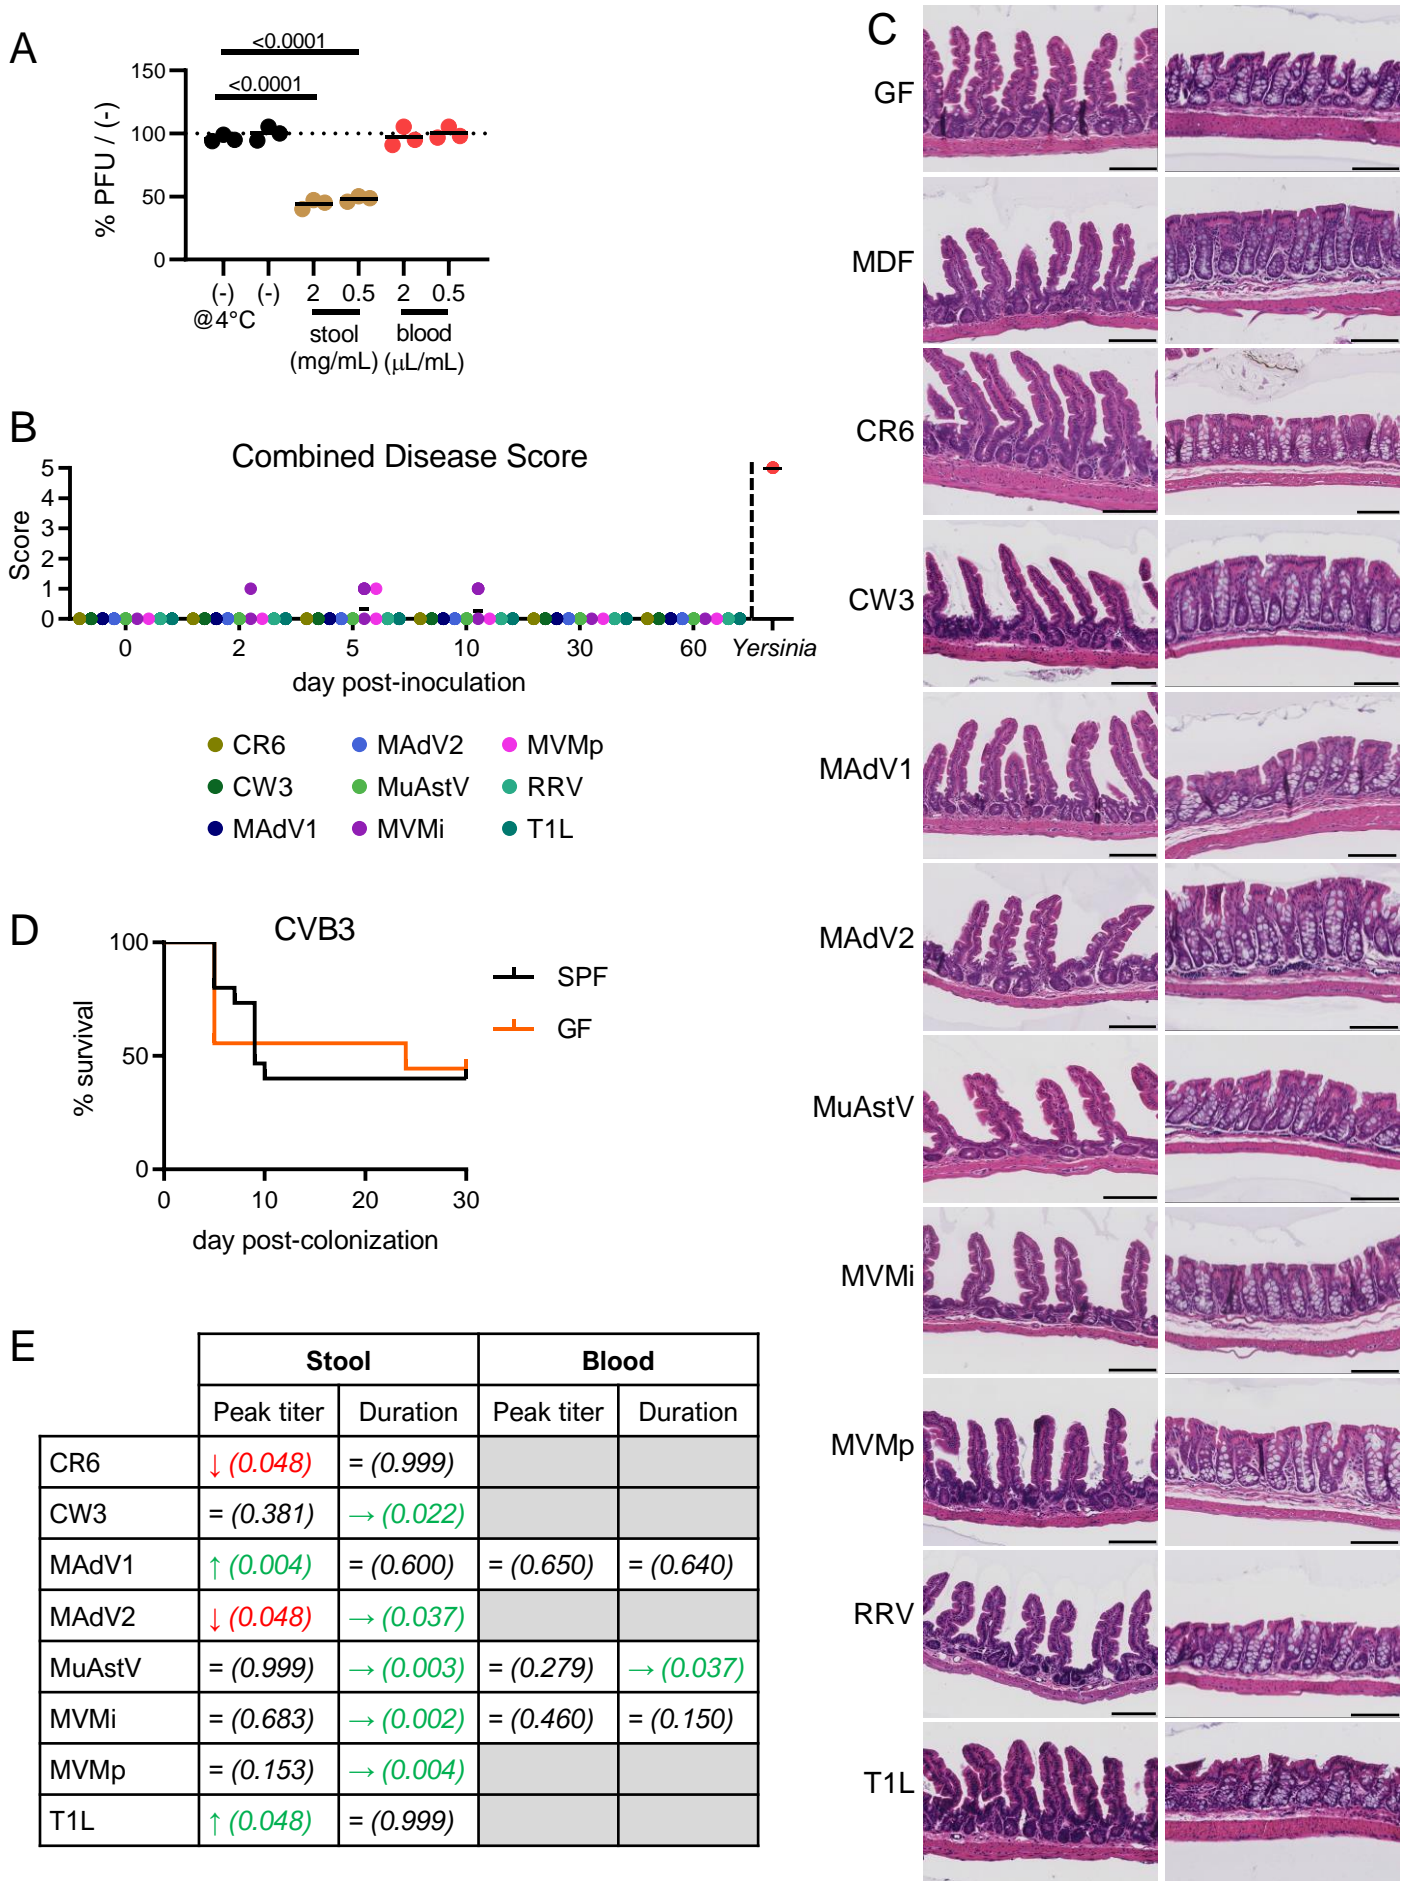

Figure S1

793 **Figure S1. Enteric Virus Infection in Conventional and GF Mice**

794 (A) Incubation of RRV at 37°C for 1 h with clarified stool lysate but not blood lead to a reduction  
795 in plaque forming units (PFUs). Values were normalized to the number of plaques observed when  
796 the same stock of RRV was kept at 4°C in parallel. Data are representative of two independent  
797 experiments. Dots depict replicates from one representative experiment. Statistical significance  
798 was calculated by ANOVA followed by Dunn's post-hoc analysis.

799 (B) GF mice inoculated with the enteric viruses shown in Figure 1 were scored at indicated days  
800 post-inoculation (dpi) for diarrhea (0: no diarrhea, 2: watery stool), hunched posture (0: no  
801 hunching, 2: hunched), and visible blood in the stool (0: no, 1: yes). As a reference, the combined  
802 disease score is shown for four GF mice orally inoculated with *Yersinia Pseudotuberculosis* on  
803 day 7 from two independent experiments.

804 (C) H&E-stained sections of the small intestine (left) and colon (right) of GF mice at 28 dpi  
805 indicating absence of overt inflammation. Bar indicates 100 µm.

806 (D) Survival of 15 conventional and 9 GF mice inoculated perorally with CVB3 from four  
807 independent experiments.

808 (E) Time course of viral loads in stool and blood of conventional versus GF mice from Figure 1  
809 were compared to identify significant differences in peak titer and duration. Statistical significance  
810 for peak titer was calculated using a non-parametric Mann-Whitney test at the timepoint with the  
811 highest viral titer in GF mice. Green upward arrow and red downward arrow refer to an increase  
812 and decrease in viral titer in GF mice, respectively. Statistical significance for the duration of viral  
813 shedding was calculated using a log-rank test. Green right-facing arrow refers to prolonged  
814 detection of virus in GF mice. Gray boxes indicate conditions in which viruses were not detected  
815 in the blood. Value in parentheses denote p-values.

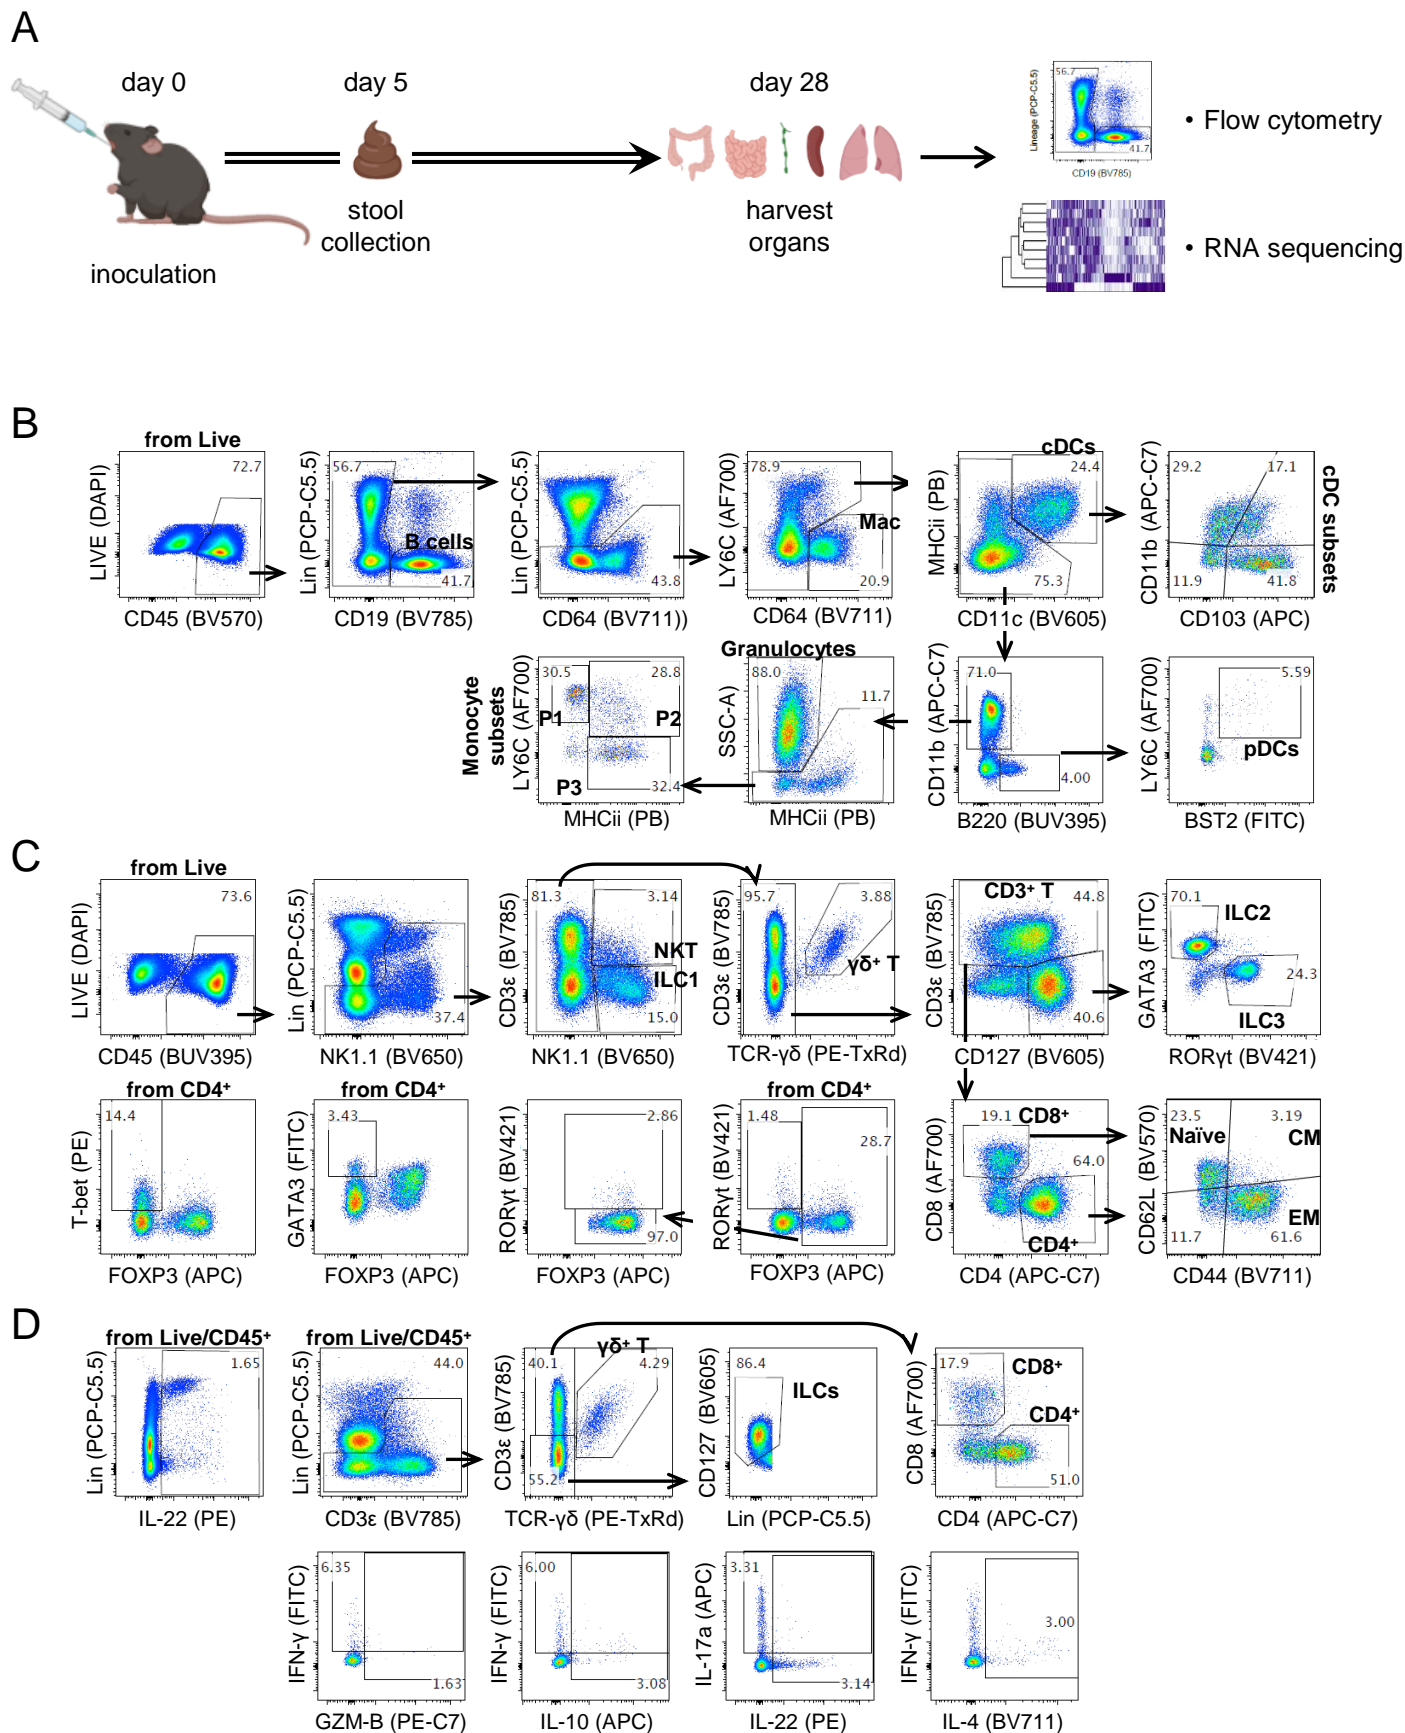

**Figure S2**



816 **Figure S2. Experimental Design and Gating Strategy**

817 (A) Experimental design for immune profiling of virus-infected mice. Five-to-six-week-old mice  
818 were untreated or inoculated with viruses or bacteria. Four weeks after inoculation, effects on  
819 immune cells and the transcriptome was evaluated. Five-to-eight mice were analyzed per  
820 condition. To ensure that each condition was represented in at least two independent experiments,  
821 results of 11 independent experiments with 8-12 mice are presented and include control untreated  
822 GF mice in each independent experiment. Prepared using BioRender.com.

823 (B-D) Flow cytometry gating strategies for B cells and myeloid cells (B), T cells and ILCs (C,  
824 transcription factors), and cytokine production (D).

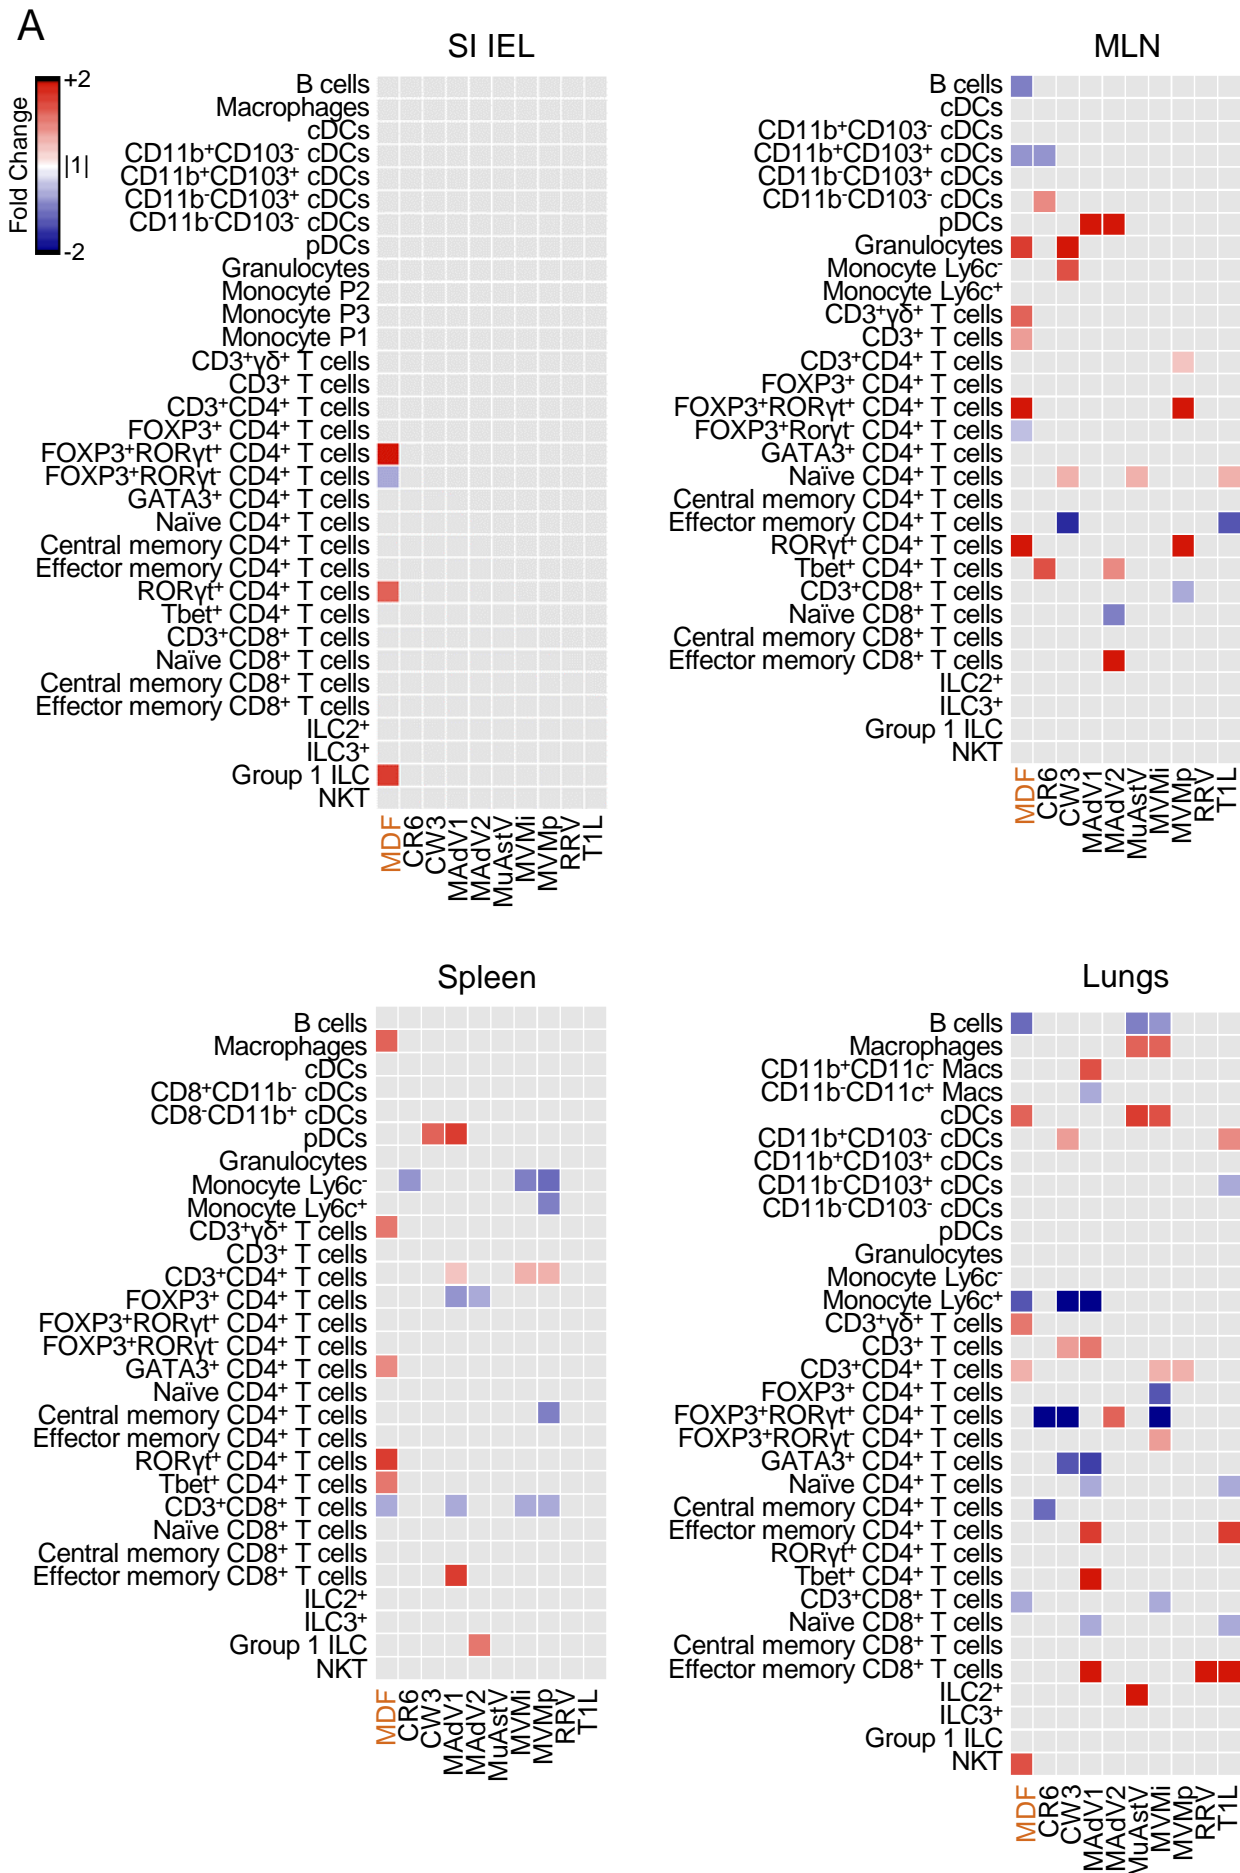

**Figure S3**

825 **Figure S3. Enteric Viruses Promote Changes in Immune Cell Populations of Extra-Intestinal**  
826 **Tissues**

827 Heatmap showing the average fold-change for each immune population relative to GF in IELs,  
828 mLNs, spleen, and lungs with an FDR<0.1. Gray: FDR>0.1.

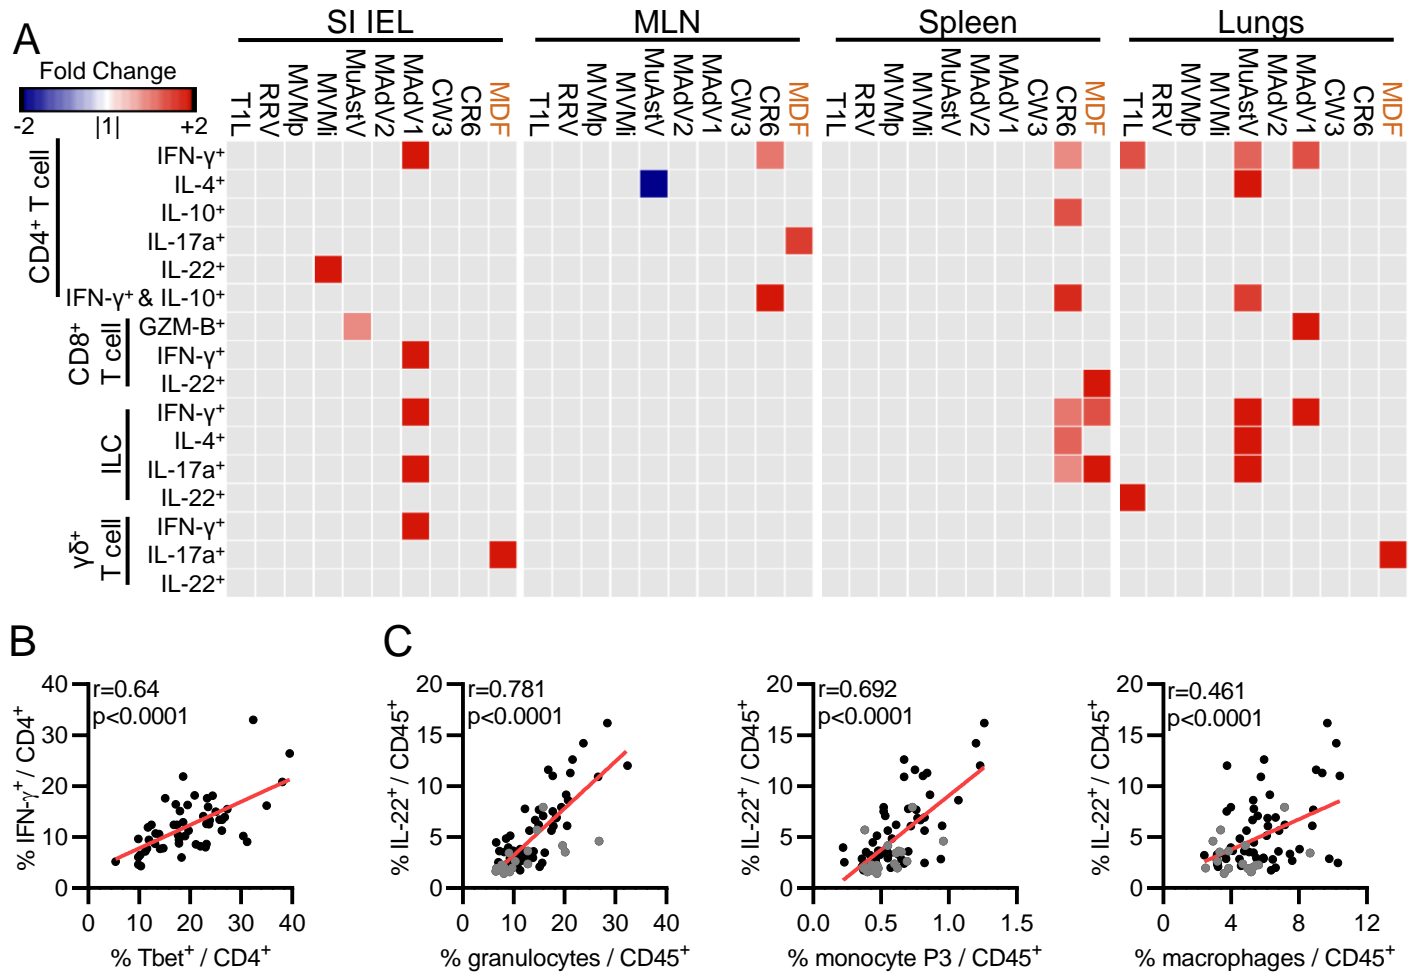

829 **Figure S4. Enteric Viruses Increase Cytokine Production by Immune Cells in Extra-**  
830 **Intestinal Tissues**

831 (A) Heatmaps showing average fold-change for cytokine-producing immune cell populations for  
832 the indicated conditions relative to GF mice in IELs, mLNs, spleen, and lungs with an FDR < 0.1.

833 Gray: FDR > 0.1.

834 (B-C) Pearson correlation between the indicated population frequencies in cLP. Black dots: virus-  
835 infected samples; gray dots: GF samples.

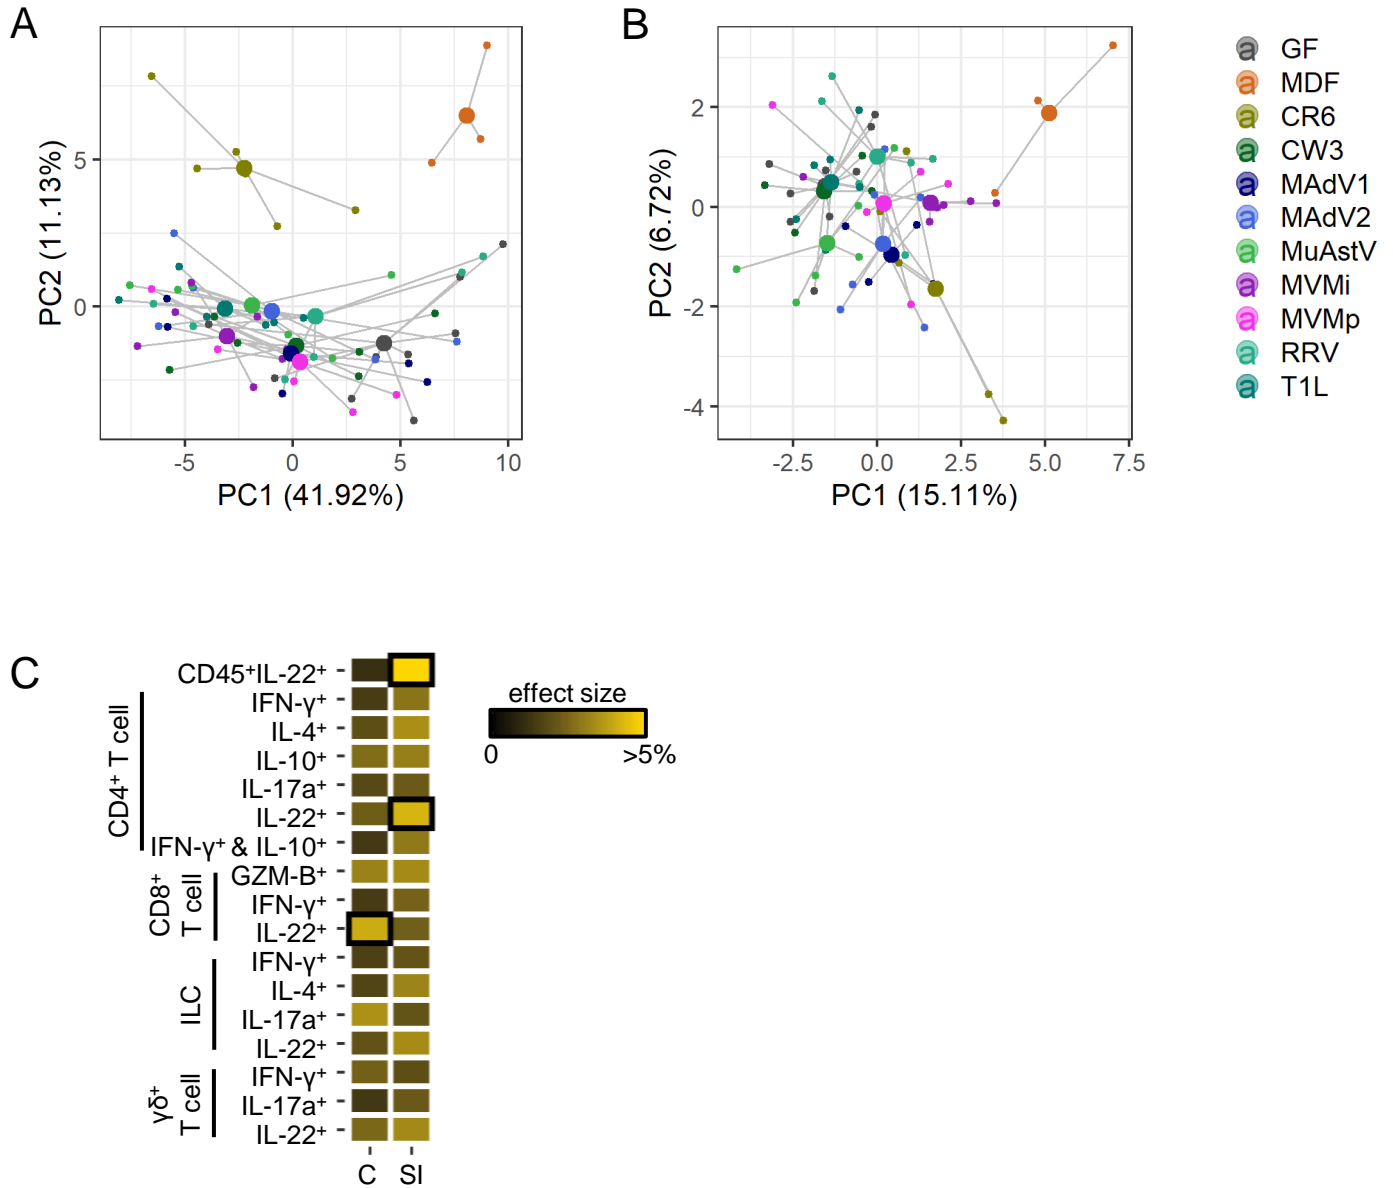

Figure S5

836 **Figure S5. Tissue Transcriptome Induced by Viral Infection**

837 (A-B) PCA clustering of the colonic (A) and small intestinal (B) DE genes. Samples inoculated  
838 with the same microbe are connected by lines to the calculated group centroids.

839 (C) db-RDA indicating the individual effect size of the cytokine production frequencies obtained  
840 by flow cytometry as explanatory variables of the DE gene variance in the colon and small  
841 intestine. Black boxes indicate  $p < 0.05$ .

A

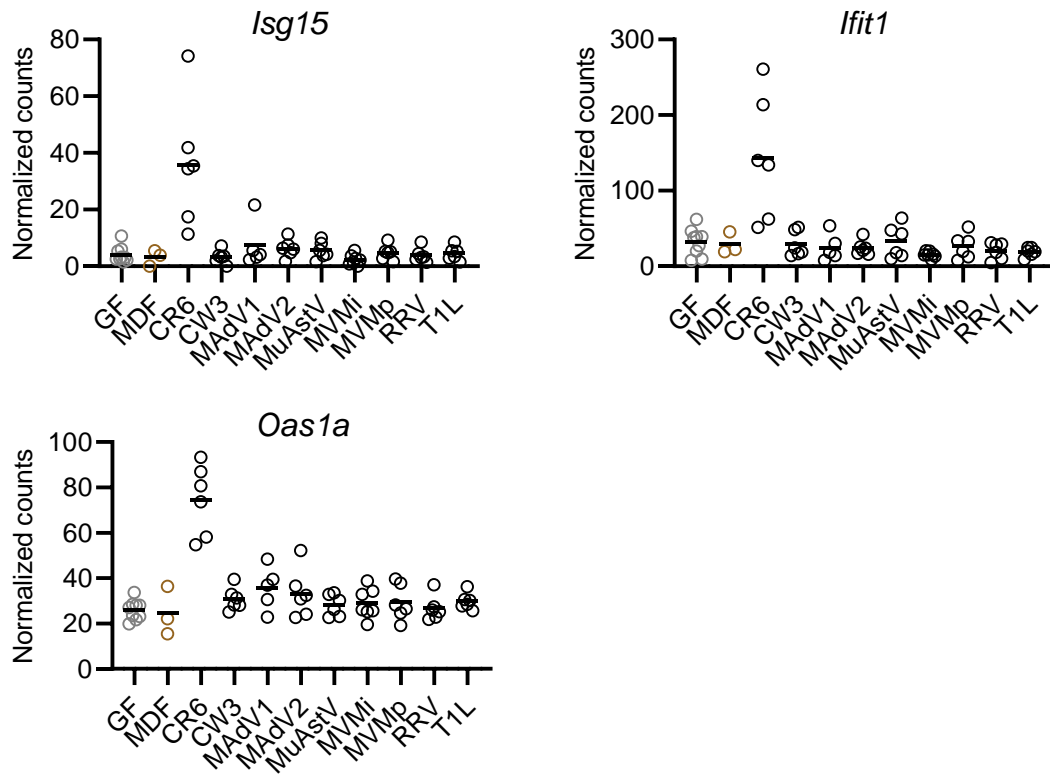

B

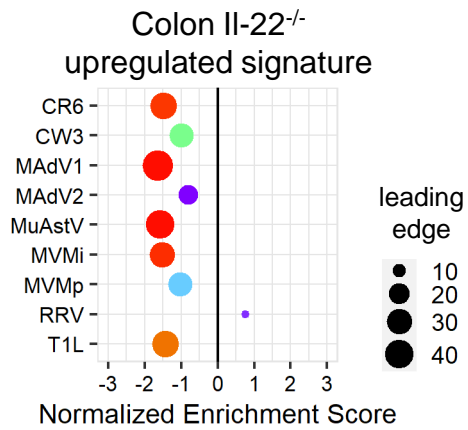

C

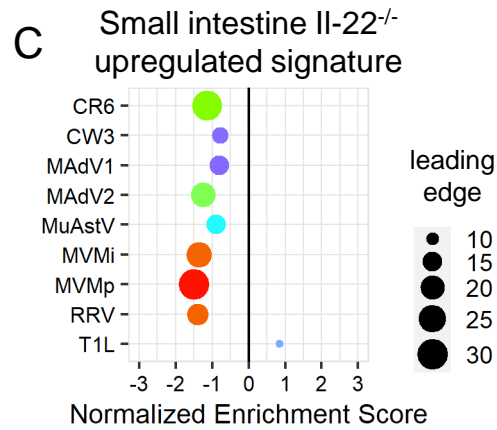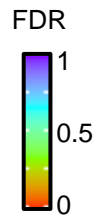

Figure S6



842 **Figure S6. Expression of Interferon-Stimulated Genes and IL-22 Signature**

843 (A) DESeq2 transformed counts of the indicated representative interferon-stimulated genes (ISGs)  
844 from RNA-Seq of the colon.

845 (B-C) Gene expression in the colon (B) and small intestine (C) from virus-infected mice were  
846 analyzed for enrichment of transcripts upregulated in the intestines of IL-22<sup>-/-</sup> mice by GSEA.

|        | <b>Primer Forward</b>                  | <b>Primer Reverse</b>    |
|--------|----------------------------------------|--------------------------|
| MAdV1  | GCACTCCATGGCAGGATTCT                   | GGTCGAAGCAGACGGTTCTTC    |
|        | TaqMan Probe: TACTGCCACTTCTGC          |                          |
| MAdV2  | GCTGACGCCCATATCCAAAT                   | GTCAGACAACCTTCCCAGGGT    |
|        | TaqMan Probe: CAGGTTTGAGTCCCGGTAGCGTTC |                          |
| MuAstV | TACATCGAGCGGGTGGTCGC                   | GTGTCACTAACGCGCACCTTTTCA |
| MNV    | CACGCCACCGATCTGTTCTG                   | GCGCTGCGCCATCACTC        |
|        | TaqMan Probe: CGCTTTGGAACAATG          |                          |
| MVM    | AGTTTGCCATGCTATTTGC                    | ACTGGTTTACTTGCTGTCC      |
|        | TaqMan Probe: ATTTCTTTTGCCTCCTTGCTGTTT |                          |
| 16s    | ACTCCTACGGGAGGCAGCAGT                  | TTACCGCGGCTGCTGGC        |

847 **Table S5: Primers and probes used in the study.**

| <b>Antibodies</b>                                                | <b>Source</b> | <b>clone</b> | <b>Identifier</b>                  |
|------------------------------------------------------------------|---------------|--------------|------------------------------------|
| Alexa Fluor 488 anti-mouse CD317 (BST2, PDCA-1) Antibody         | Biologend     | 927          | CAT#127012; RRID: AB_1953287       |
| Alexa Fluor 488 anti-mouse GATA3 Antibody                        | BD            | L50-823      | CAT#560163                         |
| Alexa Fluor 488 anti-mouse IFN- $\gamma$ Antibody                | Biologend     | XMG1.2       | CAT#505813; RRID: AB_493312        |
| PerCP/Cyanine5.5 anti-mouse NK-1.1 Antibody                      | Biologend     | PK136        | CAT#108728; RRID: AB_2132705       |
| PerCP/Cyanine5.5 anti-mouse CD90.2 (Thy-1.2) Antibody            | Biologend     | 53-2.1       | CAT#140322; RRID: AB_2562696       |
| PerCP/Cyanine5.5 anti-mouse/human CD11b Antibody                 | Biologend     | M1/70        | CAT#101228; RRID: AB_893232        |
| PerCP/Cyanine5.5 anti-mouse CD11c Antibody                       | Biologend     | N418         | CAT#117328; RRID: AB_2129641       |
| PerCP/Cyanine5.5 anti-mouse Ly-6G/Ly-6C (Gr-1) Antibody          | Biologend     | RB6-8C5      | CAT#108428; RRID: AB_893558        |
| PerCP/Cyanine5.5 anti-mouse CD19                                 | eBioscience   | eBio1D3      | CAT#45-0193-82; RRID: AB_1106999   |
| PerCP/Cyanine5.5 anti-mouse TER-119/Erythroid Cells Antibody     | Biologend     | Ter-119      | CAT#116228; RRID: AB_893636        |
| PE anti-T-bet Antibody                                           | Biologend     | 4B10         | CAT#644810; RRID: AB_2200542       |
| PE anti-mouse IL-22 Antibody                                     | eBioscience   | 1H8PWSR      | CAT#12-7221-82; RRID: AB_10597428  |
| PE-CF594 anti-mouse $\gamma\delta$ T-Cell Receptor Antibody      | BD            | GL3          | CAT#563532.                        |
| PE/Cyanine7 anti-mouse F4/80 Antibody                            | Biologend     | BM8          | CAT#123114; RRID: AB_893478        |
| PE/Cyanine7 anti-mouse Granzyme B Antibody                       | eBioscience   | NGZB         | CAT#25-8898-82; RRID: AB_10853339  |
| APC anti-mouse CD8a Antibody                                     | Biologend     | 53-6.7       | CAT#100712; RRID: AB_312751        |
| APC anti-mouse CD103 Antibody                                    | Biologend     | 2E7          | CAT#121414; RRID: AB_1227502       |
| APC anti-mouse FOXP3 Antibody                                    | eBioscience   | FJK-16s      | CAT#17-5773-82; RRID: AB_AB_469457 |
| APC anti-mouse IL-17A Antibody                                   | Biologend     | TC11-18H10.1 | CAT#506916; RRID: AB_536018        |
| Alexa Fluor 700 anti-mouse Ly-6C Antibody                        | BD            | AL-21        | CAT#561237.                        |
| Alexa Fluor 700 anti-mouse CD8a Antibody                         | Biologend     | 53-6.7       | CAT#100730; RRID: AB_493703        |
| APC/Cyanine7 anti-mouse/human CD11b Antibody                     | Biologend     | M1/70        | CAT#101226; RRID: AB_830642        |
| APC/Cyanine7 anti-mouse CD4 Antibody                             | Biologend     | GK1.5        | CAT#100414; RRID: AB_312699        |
| Pacific Blue anti-mouse I-A/I-E Antibody                         | Biologend     | M5/114.15.2  | CAT#107620; RRID: AB_493527        |
| BV421 anti-mouse ROR $\gamma$ t Antibody                         | BD            | Q31-378      | CAT#562894.                        |
| BV421 anti-mouse IL-10 Antibody                                  | BD            | JES5-16E3    | CAT#566295.                        |
| Brilliant Violet 570 anti-mouse CD45 Antibody                    | Biologend     | 30-F11       | CAT#103136; RRID: AB_2562612       |
| Brilliant Violet 570 anti-mouse CD62L Antibody                   | Biologend     | MEL-14       | CAT#104433; RRID: AB_10900262      |
| Brilliant Violet 605 anti-mouse CD11c Antibody                   | Biologend     | N418         | CAT#117334; RRID: AB_2562415       |
| Brilliant Violet 605 anti-mouse CD127 (IL-7R $\alpha$ ) Antibody | Biologend     | A7R34        | CAT#135041; RRID: AB_2572047       |

|                                                       |             |           |                                  |
|-------------------------------------------------------|-------------|-----------|----------------------------------|
| Brilliant Violet 650™ anti-mouse NK-1.1 Antibody      | Biolegend   | PK136     | CAT#108736; RRID: AB_2563159     |
| Brilliant Violet 711 anti-mouse CD64 (FcγRI) Antibody | Biolegend   | X54-5/7.1 | CAT#139311; RRID: AB_2563846     |
| Brilliant Violet 711 anti-mouse/human CD44 Antibody   | Biolegend   | IM7       | CAT#103057; RRID: AB_2564214     |
| Brilliant Violet 711 anti-mouse IL-4 Antibody         | BD          | 11B11     | CAT#564005.                      |
| Brilliant Violet 786 anti-mouse CD3e Antibody         | BD          | 145-2C11  | CAT#564379.                      |
| Super Bright 780 anti-mouse CD19 Antibody             | eBioscience | 1D3       | CAT#78-0193-82; RRID: AB_2722936 |
| BUV395 anti-mouse CD45 Antibody                       | BD          | 30-F11    | CAT#564279.                      |
| BUV395 anti-mouse CD45R/B220 Antibody                 | BD          | RA3-6B2   | CAT#563793.                      |
| Zombie UV Fixable Viability Kit                       | Biolegend   |           | CAT#505813; RRID: AB_493312      |

848 **Table S6: List of the flow cytometry antibodies used in this study.**

849 References

- 850 Abt, M.C., Buffie, C.G., Sušac, B., Becattini, S., Carter, R.A., Leiner, I., Keith, J.W., Artis, D.,  
851 Osborne, L.C., and Pamer, E.G. (2016). TLR-7 activation enhances IL-22-mediated colonization  
852 resistance against vancomycin-resistant enterococcus. *Science Translational Medicine* 8.
- 853 Atarashi, K., Tanoue, T., Shima, T., Imaoka, A., Kuwahara, T., Momose, Y., Cheng, G.,  
854 Yamasaki, S., Saito, T., Ohba, Y., et al. (2011). Induction of colonic regulatory T cells by  
855 indigenous *Clostridium* species. *Science (New York, N.Y.)* 331, 337–341.
- 856 Axelrad, J.E., Joelson, A., Green, P.H.R., Lawlor, G., Lichtiger, S., Cadwell, K., and Lebowitz,  
857 B. (2018). Enteric Infections Are Common in Patients with Flares of Inflammatory Bowel Disease.  
858 *The American Journal of Gastroenterology* 113, 1530–1539.
- 859 Axelrad, J.E., Olén, O., Askling, J., Lebowitz, B., Khalili, H., Sachs, M.C., and Ludvigsson, J.F.  
860 (2019). Gastrointestinal Infection Increases Odds of Inflammatory Bowel Disease in a Nationwide  
861 Case-Control Study. *Clinical Gastroenterology and Hepatology : The Official Clinical Practice*  
862 *Journal of the American Gastroenterological Association* 17, 1311-1322.e7.
- 863 Baldrige, M.T., Nice, T.J., McCune, B.T., Yokoyama, C.C., Kambal, A., Wheadon, M.,  
864 Diamond, M.S., Ivanova, Y., Artyomov, M., and Virgin, H.W. (2015). Commensal microbes and  
865 interferon- $\lambda$  determine persistence of enteric murine norovirus infection. *Science* 347, 266–269.
- 866 Basic, M., Keubler, L.M., Buettner, M., Achard, M., Breves, G., Schröder, B., Smoczek, A.,  
867 Jörns, A., Wedekind, D., Zschemisch, N.H., et al. (2014). Norovirus triggered microbiota-driven  
868 mucosal inflammation in interleukin 10-deficient mice. *Inflammatory Bowel Diseases* 20, 431–  
869 443.
- 870 Beura, L.K., Hamilton, S.E., Bi, K., Schenkel, J.M., Odumade, O.A., Casey, K.A., Thompson,  
871 E.A., Fraser, K.A., Rosato, P.C., Filali-Mouhim, A., et al. (2016). Normalizing the environment  
872 recapitulates adult human immune traits in laboratory mice. *Nature* 532, 512–516.
- 873 Bloom, S.M., Bijanki, V.N., Nava, G.M., Sun, L., Malvin, N.P., Donermeyer, D.L., Dunne,  
874 W.M., Allen, P.M., and Stappenbeck, T.S. (2011). Commensal *Bacteroides* species induce colitis  
875 in host-genotype-specific fashion in a mouse model of inflammatory bowel disease. *Cell Host &*  
876 *Microbe* 9, 390–403.
- 877 Blutt, S.E., and Conner, M.E. (2013). The Gastrointestinal Frontier: IgA and Viruses. *Frontiers*  
878 *in Immunology* 4, 402.

- 879 Bolsega, S., Basic, M., Smoczek, A., Buettner, M., Eberl, C., Ahrens, D., Odum, K., Stecher,  
880 B., and Bleich, A. (2019). Composition of the Intestinal Microbiota Determines the Outcome of  
881 Virus-Triggered Colitis in Mice. *Frontiers in Immunology* *10*.
- 882 Bouziat, R., Hinterleitner, R., Brown, J.J., Stencel-Baerenwald, J.E., Ikizler, M., Mayassi, T.,  
883 Meisel, M., Kim, S.M., Discepolo, V., Pruijssers, A.J., et al. (2017). Reovirus infection triggers  
884 inflammatory responses to dietary antigens and development of celiac disease. *Science* *356*, 44–  
885 50.
- 886 Bouziat, R., Biering, S.B., Kouame, E., Sangani, K.A., Kang, S., Ernest, J.D., Varma, M.,  
887 Brown, J.J., Urbanek, K., Dermody, T.S., et al. (2018). Murine Norovirus Infection Induces TH1  
888 Inflammatory Responses to Dietary Antigens. *Cell Host & Microbe* *24*, 677-688.e5.
- 889 Broggi, A., Tan, Y., Granucci, F., and Zanoni, I. (2017). IFN- $\lambda$  suppresses intestinal  
890 inflammation by non-translational regulation of neutrophil function. *Nature Immunology* *18*,  
891 1084–1093.
- 892 Brugiroux, S., Beutler, M., Pfann, C., Garzetti, D., Ruscheweyh, H.J., Ring, D., Diehl, M., Herp,  
893 S., Lötscher, Y., Hussain, S., et al. (2016). Genome-guided design of a defined mouse microbiota  
894 that confers colonization resistance against *Salmonella enterica* serovar Typhimurium. *Nature*  
895 *Microbiology* *2*.
- 896 Cadwell, K., Liu, J.Y., Brown, S.L., Miyoshi, H., Loh, J., Lennerz, J.K., Kishi, C., Kc, W.,  
897 Carrero, J.A., Hunt, S., et al. (2008). A key role for autophagy and the autophagy gene Atg1611 in  
898 mouse and human intestinal Paneth cells. *Nature* *456*, 259–263.
- 899 Cadwell, K., Patel, K.K., Maloney, N.S., Liu, T.C., Ng, A.C.Y., Storer, C.E., Head, R.D.,  
900 Xavier, R., Stappenbeck, T.S., and Virgin, H.W. (2010). Virus-Plus-Susceptibility Gene  
901 Interaction Determines Crohn’s Disease Gene Atg16L1 Phenotypes in Intestine. *Cell* *141*, 1135–  
902 1145.
- 903 Cortez, V., Boyd, D.F., Crawford, J.C., Sharp, B., Livingston, B., Rowe, H.M., Davis, A.,  
904 Alsallaq, R., Robinson, C.G., Vogel, P., et al. (2020). Astrovirus infects actively secreting goblet  
905 cells and alters the gut mucus barrier. *Nature Communications* *11*, 2097.
- 906 Drescher, K.M., von Herrath, M., and Tracy, S. (2015). Enteroviruses, hygiene and type 1  
907 diabetes: toward a preventive vaccine. *Reviews in Medical Virology* *25*, 19–32.
- 908 Fischbach, M.A. (2018). Microbiome: Focus on Causation and Mechanism. *Cell* *174*, 785–790.

- 909 Geva-Zatorsky, N., Sefik, E., Kua, L., Pasman, L., Tan, T.G., Ortiz-Lopez, A., Yanortsang,  
910 T.B., Yang, L., Jupp, R., Mathis, D., et al. (2017). Mining the Human Gut Microbiota for  
911 Immunomodulatory Organisms. *Cell* 168, 928-943.e11.
- 912 Godec, J., Tan, Y., Liberzon, A., Tamayo, P., Bhattacharya, S., Butte, A.J., Mesirov, J.P., and  
913 Haining, W.N. (2016). Compendium of Immune Signatures Identifies Conserved and Species-  
914 Specific Biology in Response to Inflammation. *Immunity* 44, 194–206.
- 915 Gopinath, S., Kim, M. v., Rakib, T., Wong, P.W., van Zandt, M., Barry, N.A., Kaisho, T.,  
916 Goodman, A.L., and Iwasaki, A. (2018). Topical application of aminoglycoside antibiotics  
917 enhances host resistance to viral infections in a microbiota-independent manner. *Nature*  
918 *Microbiology* 3, 611–621.
- 919 Grau, K.R., Zhu, S., Peterson, S.T., Helm, E.W., Philip, D., Phillips, M., Hernandez, A., Turula,  
920 H., Frasse, P., Graziano, V.R., et al. (2020). The intestinal regionalization of acute norovirus  
921 infection is regulated by the microbiota via bile acid-mediated priming of type III interferon.  
922 *Nature Microbiology* 5, 84–92.
- 923 Griffin, D.E. (2020). Measles virus persistence and its consequences. *Current Opinion in*  
924 *Virology* 41, 46–51.
- 925 Gronke, K., Hernández, P.P., Zimmermann, J., Klose, C.S.N., Kofoed-Branzk, M., Guendel,  
926 F., Witkowski, M., Tizian, C., Amann, L., Schumacher, F., et al. (2019). Interleukin-22 protects  
927 intestinal stem cells against genotoxic stress. *Nature* 566, 249–253.
- 928 Hall, A.B., Yassour, M., Sauk, J., Garner, A., Jiang, X., Arthur, T., Lagoudas, G.K., Vatanen,  
929 T., Fornelos, N., Wilson, R., et al. (2017). A novel *Ruminococcus gnavus* clade enriched in  
930 inflammatory bowel disease patients. *Genome Medicine* 9, 103.
- 931 Häring, B., Lozza, L., Steckel, B., and Geginat, J. (2009). Identification and Characterization  
932 of IL-10/IFN- $\gamma$ -producing Effector-Like T Cells With Regulatory Function in Human  
933 Blood. *The Journal of Experimental Medicine* 206, 1009–1017.
- 934 Honda, K., and Littman, D.R. (2012). The Microbiome in Infectious Disease and Inflammation.  
935 *Annual Review of Immunology* 30, 759–795.
- 936 Hooper, L. v, Wong, M.H., Thelin, A., Hansson, L., Falk, P.G., and Gordon, J.I. (2001).  
937 Molecular analysis of commensal host-microbial relationships in the intestine. *Science* (New York,  
938 N.Y.) 291, 881–884.

- 939 Ingle, H., Lee, S., Ai, T., Orvedahl, A., Rodgers, R., Zhao, G., Sullender, M., Peterson, S.T.,  
940 Locke, M., Liu, T.C., et al. (2019). Viral complementation of immunodeficiency confers protection  
941 against enteric pathogens via interferon- $\lambda$ . *Nature Microbiology* 4, 1120–1128.
- 942 Ivanov, I.I., Atarashi, K., Manel, N., Brodie, E.L., Shima, T., Karaoz, U., Wei, D., Goldfarb,  
943 K.C., Santee, C.A., Lynch, S. v, et al. (2009). Induction of intestinal Th17 cells by segmented  
944 filamentous bacteria. *Cell* 139, 485–498.
- 945 Kane, M., Case, L.K., Kopaskie, K., Kozlova, A., MacDermid, C., Chervonsky, A. v, and  
946 Golovkina, T. v (2011). Successful transmission of a retrovirus depends on the commensal  
947 microbiota. *Science* 334, 245–249.
- 948 Keir, M.E., Yi, T., Lu, T.T., and Ghilardi, N. (2020). The role of IL-22 in intestinal health and  
949 disease. *Journal of Experimental Medicine* 217.
- 950 Kernbauer, E., Ding, Y., and Cadwell, K. (2014). An enteric virus can replace the beneficial  
951 function of commensal bacteria. *Nature* 516, 94–98.
- 952 Kim, Y.-G., Park, J.-H., Reimer, T., Baker, D.P., Kawai, T., Kumar, H., Akira, S., Wobus, C.,  
953 and Núñez, G. (2011). Viral infection augments Nod1/2 signaling to potentiate lethality associated  
954 with secondary bacterial infections. *Cell Host & Microbe* 9, 496–507.
- 955 Kuss, S.K., Best, G.T., Etheredge, C.A., Pruijssers, A.J., Frierson, J.M., Hooper, L. v.,  
956 Dermody, T.S., and Pfeiffer, J.K. (2011). Intestinal Microbiota Promote Enteric Virus Replication  
957 and Systemic Pathogenesis. *Science* 334, 249–252.
- 958 Lee, S., Liu, H., Wilen, C.B., Sychev, Z.E., Desai, C., Hykes, B.L., Orchard, R.C., McCune,  
959 B.T., Kim, K.-W., Nice, T.J., et al. (2019). A Secreted Viral Nonstructural Protein Determines  
960 Intestinal Norovirus Pathogenesis. *Cell Host & Microbe* 25, 845-857.e5.
- 961 Liang, G., Zhao, C., Zhang, H., Mattei, L., Sherrill-Mix, S., Bittinger, K., Kessler, L.R., Wu,  
962 G.D., Baldassano, R.N., DeRusso, P., et al. (2020). The stepwise assembly of the neonatal virome  
963 is modulated by breastfeeding. *Nature* 581, 470–474.
- 964 Lim, E.S., Zhou, Y., Zhao, G., Bauer, I.K., Droit, L., Ndao, I.M., Warner, B.B., Tarr, P.I.,  
965 Wang, D., and Holtz, L.R. (2015). Early life dynamics of the human gut virome and bacterial  
966 microbiome in infants. *Nature Medicine* 21, 1228–1234.
- 967 Lin, J. da, Devlin, J.C., Yeung, F., McCauley, C., Leung, J.M., Chen, Y.H., Cronkite, A.,  
968 Hansen, C., Drake-Dunn, C., Ruggles, K. v., et al. (2020). Rewilding Nod2 and Atg16l1 Mutant



- 969 Mice Uncovers Genetic and Environmental Contributions to Microbial Responses and Immune  
970 Cell Composition. *Cell Host and Microbe* 27, 830-840.e4.
- 971 Liu, L., Gong, T., Tao, W., Lin, B., Li, C., Zheng, X., Zhu, S., Jiang, W., and Zhou, R. (2019).  
972 Commensal viruses maintain intestinal intraepithelial lymphocytes via noncanonical RIG-I  
973 signaling. *Nature Immunology* 20, 1681–1691.
- 974 Matsuzawa-Ishimoto, Y., Shono, Y., Gomez, L.E., Hubbard-Lucey, V.M., Cammer, M., Neil,  
975 J., Dewan, M.Z., Lieberman, S.R., Lazrak, A., Marinis, J.M., et al. (2017). Autophagy protein  
976 ATG16L1 prevents necroptosis in the intestinal epithelium. *The Journal of Experimental Medicine*  
977 214, 3687–3705.
- 978 Matsuzawa-Ishimoto, Y., Hine, A., Shono, Y., Rudensky, E., Lazrak, A., Yeung, F., Neil, J.A.,  
979 Yao, X., Chen, Y.-H., Heaney, T., et al. (2020). An intestinal organoid-based platform that  
980 recreates susceptibility to T-cell-mediated tissue injury. *Blood* 135, 2388–2401.
- 981 Mazmanian, S.K., Liu, C.H., Tzianabos, A.O., and Kasper, D.L. (2005). An  
982 immunomodulatory molecule of symbiotic bacteria directs maturation of the host immune system.  
983 *Cell* 122, 107–118.
- 984 Neil, J.A., Matsuzawa-Ishimoto, Y., Kernbauer-Hölzl, E., Schuster, S.L., Sota, S., Venzon, M.,  
985 Dallari, S., Galvao Neto, A., Hine, A., Hudesman, D., et al. (2019). IFN-I and IL-22 mediate  
986 protective effects of intestinal viral infection. *Nature Microbiology* 4, 1737–1749.
- 987 Norman, J.M., Handley, S.A., Baldrige, M.T., Droit, L., Liu, C.Y., Keller, B.C., Kambal, A.,  
988 Monaco, C.L., Zhao, G., Fleshner, P., et al. (2015). Disease-specific alterations in the enteric  
989 virome in inflammatory bowel disease. *Cell* 160, 447–460.
- 990 Nyström, N., Berg, T., Lundin, E., Skog, O., Hansson, I., Frisk, G., Juko-Pecirep, I., Nilsson,  
991 M., Gyllensten, U., Finkel, Y., et al. (2013). Human enterovirus species B in ileocecal Crohn’s  
992 disease. *Clinical and Translational Gastroenterology* 4, e38.
- 993 Pane, J.A., and Coulson, B.S. (2015). Lessons from the mouse: potential contribution of  
994 bystander lymphocyte activation by viruses to human type 1 diabetes. *Diabetologia* 58, 1149–  
995 1159.
- 996 Png, C.W., Lindén, S.K., Gilshenan, K.S., Zoetendal, E.G., McSweeney, C.S., Sly, L.I.,  
997 McGuckin, M.A., and Florin, T.H.J. (2010). Mucolytic bacteria with increased prevalence in IBD  
998 mucosa augment in vitro utilization of mucin by other bacteria. *The American Journal of*  
999 *Gastroenterology* 105, 2420–2428.

- 1000 Ramanan, D., Tang, M.S., Bowcutt, R., Loke, P., and Cadwell, K. (2014). Bacterial sensor  
1001 Nod2 prevents inflammation of the small intestine by restricting the expansion of the commensal  
1002 *Bacteroides vulgatus*. *Immunity* *41*, 311–324.
- 1003 Ramanan, D., Bowcutt, R., Lee, S.C., Tang, M.S., Kurtz, Z.D., Ding, Y., Honda, K., Gause,  
1004 W.C., Blaser, M.J., Bonneau, R.A., et al. (2016). Helminth infection promotes colonization  
1005 resistance via type 2 immunity. *Science* *352*, 608–612.
- 1006 Rath, H.C., Wilson, K.H., and Sartor, R.B. (1999). Differential induction of colitis and gastritis  
1007 in HLA-B27 transgenic rats selectively colonized with *Bacteroides vulgatus* or *Escherichia coli*.  
1008 *Infection and Immunity* *67*, 2969–2974.
- 1009 Round, J.L., and Mazmanian, S.K. (2009). The gut microbiota shapes intestinal immune  
1010 responses during health and disease. *Nature Reviews Immunology* *9*, 313–323.
- 1011 Sefik, E., Geva-Zatorsky, N., Oh, S., Konnikova, L., Zemmour, D., McGuire, A.M., Burzyn,  
1012 D., Ortiz-Lopez, A., Lobera, M., Yang, J., et al. (2015a). Individual intestinal symbionts induce a  
1013 distinct population of ROR $\gamma$ + regulatory T cells. *Science* *349*, 993–997.
- 1014 Sefik, E., Geva-Zatorsky, N., Oh, S., Konnikova, L., Zemmour, D., McGuire, A.M., Burzyn,  
1015 D., Ortiz-Lopez, A., Lobera, M., Yang, J., et al. (2015b). Individual intestinal symbionts induce a  
1016 distinct population of ROR $\gamma$ + regulatory T cells. *Science* *349*, 993–997.
- 1017 Šestan, M., Marinović, S., Kavazović, I., Cekinović, Đ., Wueest, S., Turk Wensveen, T., Brizić,  
1018 I., Jonjić, S., Konrad, D., Wensveen, F., et al. (2018). Virus-Induced Interferon- $\gamma$  Causes Insulin  
1019 Resistance in Skeletal Muscle and Derails Glycemic Control in Obesity. *Immunity* *49*.
- 1020 Shaffer, A.L., Lin, K.I., Kuo, T.C., Yu, X., Hurt, E.M., Rosenwald, A., Giltneane, J.M., Yang,  
1021 L., Zhao, H., Calame, K., et al. (2002). Blimp-1 orchestrates plasma cell differentiation by  
1022 extinguishing the mature B cell gene expression program. *Immunity* *17*, 51–62.
- 1023 Shi, Z., Zou, J., Zhang, Z., Zhao, X., Noriega, J., Zhang, B., Zhao, C., Ingle, H., Bittinger, K.,  
1024 Mattei, L.M., et al. (2019). Segmented Filamentous Bacteria Prevent and Cure Rotavirus Infection.  
1025 *Cell* *179*, 644-658.e13.
- 1026 Sutherland, D.M., Aravamudhan, P., Dietrich, M.H., Stehle, T., and Dermody, T.S. (2018).  
1027 Reovirus Neurotropism and Virulence Are Dictated by Sequences in the Head Domain of the Viral  
1028 Attachment Protein. *Journal of Virology* *92*.
- 1029 Szabo, S., Kim, S., Costa, G., Zhang, X., Fathman, C., and Glimcher, L. (2000). A Novel  
1030 Transcription Factor, T-bet, Directs Th1 Lineage Commitment. *Cell* *100*, 655–669.

- 1031 Takahashi, K., Nakagawasai, O., Nemoto, W., Odaira, T., Sakuma, W., Onogi, H., Nishijima,  
1032 H., Furihata, R., Nemoto, Y., Iwasa, H., et al. (2019). Effect of *Enterococcus faecalis* 2001 on  
1033 colitis and depressive-like behavior in dextran sulfate sodium-treated mice: involvement of the  
1034 brain–gut axis. *Journal of Neuroinflammation* *16*, 201.
- 1035 Tan, T.G., Sefik, E., Geva-Zatorsky, N., Kua, L., Naskar, D., Teng, F., Pasman, L., Ortiz-Lopez,  
1036 A., Jupp, R., Wu, H.J.J., et al. (2016). Identifying species of symbiont bacteria from the human  
1037 gut that, alone, can induce intestinal Th17 cells in mice. *Proceedings of the National Academy of*  
1038 *Sciences of the United States of America* *113*, E8141–E8150.
- 1039 Tomov, V.T., Palko, O., Lau, C.W., Pattekar, A., Sun, Y., Tacheva, R., Bengsch, B., Manne,  
1040 S., Cosma, G.L., Eisenlohr, L.C., et al. (2017). Differentiation and Protective Capacity of Virus-  
1041 Specific CD8+ T Cells Suggest Murine Norovirus Persistence in an Immune-Privileged Enteric  
1042 Niche. *Immunity* *47*, 723-738.e5.
- 1043 Ungaro, F., Massimino, L., Furfaro, F., Rimoldi, V., Peyrin-Biroulet, L., D’Alessio, S., and  
1044 Danese, S. (2019). Metagenomic analysis of intestinal mucosa revealed a specific eukaryotic gut  
1045 virome signature in early-diagnosed inflammatory bowel disease. *Gut Microbes* *10*, 149–158.
- 1046 Upfill-Brown, A., Taniuchi, M., Platts-Mills, J.A., Kirkpatrick, B., Burgess, S.L., Oberste,  
1047 M.S., Weldon, W., Houghton, E., Haque, R., Zaman, K., et al. (2017). Nonspecific Effects of Oral  
1048 Polio Vaccine on Diarrheal Burden and Etiology Among Bangladeshi Infants. *Clinical Infectious*  
1049 *Diseases* *65*, 414–419.
- 1050 Vehik, K., Lynch, K.F., Wong, M.C., Tian, X., Ross, M.C., Gibbs, R.A., Ajami, N.J., Petrosino,  
1051 J.F., Rewers, M., Toppari, J., et al. (2019). Prospective virome analyses in young children at  
1052 increased genetic risk for type 1 diabetes. *Nature Medicine* *25*, 1865–1872.
- 1053 Wang, S., Hibberd, M.L., Pettersson, S., and Lee, Y.K. (2014). *Enterococcus faecalis* from  
1054 Healthy Infants Modulates Inflammation through MAPK Signaling Pathways. *PLoS ONE* *9*,  
1055 e97523.
- 1056 Winkle, J.A. van, Robinson, B.A., Peters, A.M., Li, L., Nouboussi, R. v., Mack, M., and Nice,  
1057 T.J. (2018). Persistence of systemic murine norovirus is maintained by inflammatory recruitment  
1058 of susceptible myeloid cells. *Cell Host & Microbe* *24*, 665.
- 1059 Yang, J.Y., Kim, M.S., Kim, E., Cheon, J.H., Lee, Y.S., Kim, Y., Lee, S.H., Seo, S.U., Shin,  
1060 S.H., Choi, S.S., et al. (2016). Enteric Viruses Ameliorate Gut Inflammation via Toll-like Receptor  
1061 3 and Toll-like Receptor 7-Mediated Interferon- $\beta$  Production. *Immunity* *44*, 889–900.

1062 Yeung, F., Chen, Y.H., Lin, J. da, Leung, J.M., McCauley, C., Devlin, J.C., Hansen, C.,  
1063 Cronkite, A., Stephens, Z., Drake-Dunn, C., et al. (2020). Altered Immunity of Laboratory Mice  
1064 in the Natural Environment Is Associated with Fungal Colonization. *Cell Host and Microbe* 27,  
1065 809-822.e6.

1066 Yokoyama, C.C., Loh, J., Zhao, G., Stappenbeck, T.S., Wang, D., Huang, H. v., Virgin, H.W.,  
1067 and Thackray, L.B. (2012). Adaptive Immunity Restricts Replication of Novel Murine  
1068 Astroviruses. *Journal of Virology* 86, 12262–12270.

1069 Yu, S., Balasubramanian, I., Laubitz, D., Tong, K., Bandyopadhyay, S., Lin, X., Flores, J.,  
1070 Singh, R., Liu, Y., Macazana, C., et al. (2020). Paneth Cell-Derived Lysozyme Defines the  
1071 Composition of Mucolytic Microbiota and the Inflammatory Tone of the Intestine. *Immunity* 53,  
1072 398-416.e8.

1073 Zhao, G., Vatanen, T., Droit, L., Park, A., Kostic, A.D., Poon, T.W., Vlamakis, H., Siljander,  
1074 H., Härkönen, T., Hämäläinen, A.-M., et al. (2017). Intestinal virome changes precede  
1075 autoimmunity in type I diabetes-susceptible children. *Proceedings of the National Academy of*  
1076 *Sciences of the United States of America* 114, E6166–E6175.
